# Supplementary material for: Total syntheses of (Sp)-(+)- and (Rp)-(−)-spiniferin-1, a pair of unusual natural products with planar chirality
Source: Royal Society of Chemistry journal article supplement (doi:10.1039/c1cc13650j), 2011-01-01
Supplement: c1cc13650j.pdf [file c1cc13650j.pdf]

## Supporting Information

Total syntheses of  $S_p$ -(+)- and  $R_p$ -(-)-spiniferin-1,  
a pair of unusual natural products with planar chirality

Yun-Shan Sun, Kai Ding and Wei-Sheng Tian\*

*Key Laboratory of Synthetic Chemistry of Natural Substances, Shanghai Institute of Organic Chemistry, Chinese  
Academy of Sciences, 345 Lingling Road, Shanghai, China. E-mail: wstian@mail.sioc.ac.cn*

## Experimental Section

### General experimental information

Unless otherwise noted, all reactions in exclusively organic solvents were performed under an oxygen-free atmosphere of argon with rigid exclusion of moisture from reagents and glassware. Dichloromethane, DMSO, DMF, <sup>1</sup>PrOH and Et<sub>3</sub>N was distilled from calcium hydride. Tetrahydrofuran was distilled from a blue solution of sodium benzophenone ketyl. 1,4-Dioxane was distilled from LiAlH<sub>4</sub>. Analytical thin layer chromatography (TLC) was performed using silica gel F254 plates. The developed chromatogram was analyzed by UV lamp (254 nm). Liquid chromatography was performed using a forced flow (flash chromatography) of the indicated solvent system on Silica Gel (200-300 mesh). <sup>1</sup>H and <sup>13</sup>C NMR spectra were recorded in CDCl<sub>3</sub>, unless otherwise noted, on a Varian 300 MHz spectrometer. Chemical shifts in <sup>1</sup>H NMR spectra are reported in parts per million (ppm) on the δ scale referenced to the residual peak of CHCl<sub>3</sub> at δ 7.26 ppm. Data are reported as follows: chemical shift, multiplicity (s = singlet, d = doublet, t = triplet, q = quartet, m = multiplet), coupling constant in hertz (Hz), and integration. Chemical shifts of <sup>13</sup>C NMR spectra are reported in ppm referenced to the central peak of CDCl<sub>3</sub> (77.16 ppm) on the δ scale. IR spectra were measured on a BIO-RAD-FTS-185 instrument. Optical rotations were measured on a PERKIN ELMER Polarimeter 341. Melting points were recorded on a SGW X-4 type microscope and not corrected. Chiral HPLC analyses were performed on Waters Millennium station with a tunable UV detector at wavelength λ = 254 nm. The single-crystal X-ray diffraction data for compound **5** were collected on a Bruker Smart Apex diffractometer. Data of mass spectra and elemental analysis were provided by Laboratory of Analytical Chemistry at Shanghai Institute of Organic Chemistry. Compound **6**, **7**, **11a** and **11b** were prepared according to the previous procedures.<sup>2</sup>

### Compound **4** and **4'**

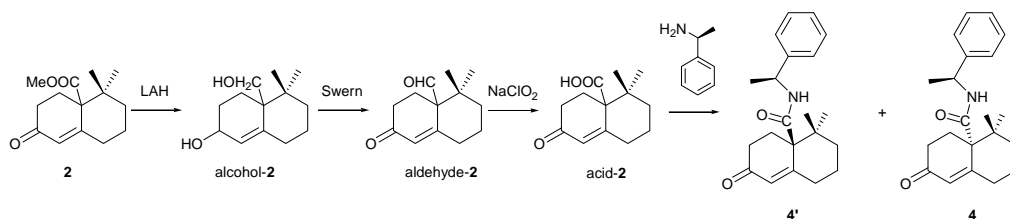

To a stirred solution of compound **2** (0.634 g, 2.68 mmol) in dry THF (12 mL) at room temperature was added LiAlH<sub>4</sub> (0.405 g, 10.72 mmol) in portions. After the addition the mixture was stirred at room temperature for 4 hrs, then quenched carefully by the addition of wet Na<sub>2</sub>SO<sub>4</sub>. The reaction mixture was filtered and the filtrate was concentrated *in vacuo*. The residue was purified by column chromatography to give **alcohol-2** (0.53 g, 94%) as a white solid.

**Alcohol-2**: m.p. 107-108 °C; IR (KBr) ν 3313, 1666 cm<sup>-1</sup>; <sup>1</sup>HNMR: δ = 5.92 (dd, J = 1.8, 4.8Hz, 1H, CH=), 4.05 (dd, J = 4.2, 8.7 Hz, 1H, O-CH-C=), 3.95 (d, J = 9.9 Hz, 1H, O-CHH-), 3.37 (d, J = 10.2Hz, 1H, O-CHH-), 2.62 (broad, 2H, 2OH), 2.15 (dt, J = 5.4Hz, 13.2Hz, 1H), 2.01-2.07 (m, 1H), 1.48-1.82 (m, 7H), 1.15-1.23 (m, 1H), 0.88 (s, 3H, CH<sub>3</sub>), 0.82 (s, 3H, CH<sub>3</sub>); EIMS: 210 (M), 162 (M-CH<sub>2</sub>OH-H<sub>2</sub>O), 147 (M-CH<sub>2</sub>OH-H<sub>2</sub>O-CH<sub>3</sub>), 100); Anal. Calcd. for C<sub>13</sub>H<sub>22</sub>O<sub>2</sub>: C, 74.24; H, 10.54. Found: C, 74.31; H, 10.56.

To a stirred solution of  $(\text{COCl})_2$  (1.14 mL, 13.06 mmol) in dry  $\text{CH}_2\text{Cl}_2$  (100 mL) at  $-78^\circ\text{C}$  was added DMSO (1.82 mL, 25.67 mmol) dropwise. After stirring at  $-78^\circ\text{C}$  for half an hour a solution of **alcohol-2** (1.14 g, 5.42 mmol) in  $\text{CH}_2\text{Cl}_2$  (10 mL) was added dropwise at  $-78^\circ\text{C}$ . The mixture was stirred at this temperature for another 40 mins, then  $\text{Et}_3\text{N}$  (7.52 mL, 54.20 mmol) was added slowly. The reaction became a clear solution and the solution was allowed to stir at room temperature for 1.5 hours. To the reaction solution was added saturated  $\text{NaHCO}_3$  aqueous solution (50mL) and the organic phase was separated. The aqueous phase was extracted with  $\text{CH}_2\text{Cl}_2$  ( $1 \times 40\text{mL}$ ) and the combined organic phases were washed with water (30mL), brine (30mL), dried over anhydrous  $\text{MgSO}_4$  and filtered. The filtrate was evaporated *in vacuo* and the residue was purified by column chromatography (silica gel, petroleum:EtOAc 8:1) to yield **aldehyde-2** (1.01 g, 91%) as a colorless oil.

**Aldehyde-2**:  $R_f = 0.5$  (silica gel, Petroleum: EtOAc 3:1); IR (neat)  $\nu$  1716, 1676, 1618  $\text{cm}^{-1}$ ;  $^1\text{H}$ NMR:  $\delta = 9.90$  (s, 1H,  $-\text{CHO}$ ), 6.00 (d,  $J = 1.5$  Hz, 1H,  $\text{CH}=\text{}$ ), 1.42-2.73 (m, 10H), 1.09 (s, 3H,  $\text{CH}_3$ ), 0.94 (s, 3H,  $\text{CH}_3$ ); EIMS: 206 (M, 42.65), 191 (M- $\text{CH}_3$ , 10.87); Anal. Calcd. for  $\text{C}_{13}\text{H}_{18}\text{O}_2$ : C, 75.69; H, 8.80. Found: C, 75.38; H, 9.00.

**Aldehyde-2** (1.66 g, 8.1 mmol) was dissolved in a mixture of  $^i\text{BuOH}$  (70 mL) and distilled water (42 mL). At  $0^\circ\text{C}$   $\text{NaH}_2\text{PO}_4 \cdot 2\text{H}_2\text{O}$  (4.79 g, 30.71 mmol), DMSO (8.55 mL, 0.12 mol) and  $\text{NaClO}_2$  (1.82 g, 16.18 mmol, 80% purity) were added in turn. The reaction was done after 18 mins by TLC. To the reaction solution was added EtOAc (100 mL) and water (20 mL) and the organic phase was separated. The aqueous phase was extracted with EtOAc ( $3 \times 50$  mL) and the combined organic phases were washed with water (20 mL), brine (20 mL), dried over anhydrous  $\text{MgSO}_4$  and filtered. The filtrate was evaporated *in vacuo* and the residue was purified by column chromatography (silica gel, petroleum:EtOAc 3:1, several drops of  $\text{HCOOH}$  added) to yield **acid-2** (1.34 g, 75%) as a white solid.

**Acid-2**: m.p.:  $120\text{-}122^\circ\text{C}$ ;  $R_f = 0.2$  (silica gel, Petroleum: EtOAc 3:1); IR (KBr)  $\nu_{\text{max}}$  2970, 1712, 1628, 1600  $\text{cm}^{-1}$ ;  $^1\text{H}$ NMR:  $\delta = 5.97$  (d,  $J = 2.1$  Hz, 1H,  $=\text{CH}$ ), 2.91-3.05 (m, 1H), 2.36-2.54 (m, 4H), 1.92-2.07 (m, 2H), 1.63-1.75 (m, 2H), 1.37 (d,  $J = 13.5\text{Hz}$ , 1H), 1.07 (s, 3H,  $\text{CH}_3$ ), 0.97 (s, 3H,  $\text{CH}_3$ ); EIMS: 222 (M, 28.97), 207 (M- $\text{CH}_3$ , 23.38); Anal. Calcd. for  $\text{C}_{13}\text{H}_{18}\text{O}_3$ : C, 70.24; H, 8.16. Found: C, 70.15; H, 8.19.

To a stirred solution of DMF (0.48 mL, 6.26 mmol) in dry  $\text{CH}_2\text{Cl}_2$  (9 mL) at  $-20^\circ\text{C}$  was added  $(\text{COCl})_2$  (0.22 mL, 2.52 mmol) dropwise. After stirring at  $-20^\circ\text{C}$  for 20 mins a solution of **acid-2** (0.46 g, 2.09 mmol) in  $\text{CH}_2\text{Cl}_2$  (9 mL) was added dropwise at  $-20^\circ\text{C}$ . The mixture was stirred at this temperature for another 20 min, then (*S*)- $\alpha$ -methylbenzylamine (1.15 mL, 8.92 mmol) was added slowly. The reaction mixture was stirred at  $-20^\circ\text{C}$  for 10 mins then at room temperature for 15 min. To the reaction solution was added EtOAc (50mL) and water (10mL) and the solution was acidified by 5%  $\text{HCl}$  solution. The organic phase was separated and the aqueous phase was extracted with EtOAc ( $2 \times 30\text{mL}$ ). The combined organic phases were washed with 5%  $\text{NaHCO}_3$  solution (10mL), water (10 mL), brine (10mL), dried over anhydrous  $\text{MgSO}_4$  and filtered. The filtrate was evaporated *in vacuo* and the residue was purified by column chromatography (silica gel, petroleum:EtOAc 5:1) to **4** (0.26 g, 39%) and **4'** (0.28 g, 41%).

**4**: as a white solid. m.p.:  $149\text{-}156^\circ\text{C}$ ;  $R_f = 0.18$  (silica gel, Petroleum: EtOAc 5:1);  $[\alpha]_{\text{D}}^{28} = -236.6$  (c 0.63,  $\text{CHCl}_3$ ); IR (KBr)  $\nu_{\text{max}}$  3383, 1648, 1611  $\text{cm}^{-1}$ ;  $^1\text{H}$ NMR:  $\delta = 7.25\text{-}7.40$  (m, 5H,  $\text{C}_6\text{H}_5$ ), 6.01 (s, 1H,  $\text{CH}=\text{}$ ), 5.89 (d,  $J = 7.8\text{Hz}$ , 1H,  $-\text{NH}-$ ), 5.13 (dt,  $J = 6.9, 6.9\text{Hz}$ , 1H,  $\text{PhCH}$ ), 2.81-2.96 (m, 1H), 2.02-2.55 (m, 5H), 1.65-1.88 (m,

3H), 1.49(d,  $J = 7.2\text{Hz}$ , 3H, N-C-CH<sub>3</sub>), 1.28-1.34 (m, 1H), 1.08 (s, 3H, CH<sub>3</sub>), 0.91 (s, 3H, CH<sub>3</sub>); EIMS: 325 (M, 18.38); Anal. Calcd. for C<sub>21</sub>H<sub>27</sub>NO<sub>2</sub>: C, 77.50; H, 8.36; N, 4.30. Found: C, 77.41; H, 8.32; N, 4.09.

**4'**: as a white solid. m.p.: 108-113 °C;  $R_f = 0.22$  (silica gel, Petroleum: EtOAc 5:1);  $[\alpha]_D^{28} = +163.1$  (c 0.82, CHCl<sub>3</sub>); IR (KBr)  $\nu_{\text{max}}$  3371, 1647, 1602 cm<sup>-1</sup>; <sup>1</sup>HNMR:  $\delta = 7.25\text{-}7.40$ (m, 5H, C<sub>6</sub>H<sub>5</sub>), 6.00(d,  $J = 1.8\text{Hz}$ , 1H, CH=), 5.87(d,  $J = 7.2\text{Hz}$ , 1H, -NH-), 5.16(dt,  $J = 6.9, 6.9\text{Hz}$ , 1H, PhCH), 2.78-2.93 (m, 1H), 2.04-2.47 (m, 5H), 1.63-1.88 (m, 3H), 1.49(d,  $J = 7.2\text{Hz}$ , 3H, N-C-CH<sub>3</sub>), 1.28-1.37 (m, 1H), 1.16(s, 3H, CH<sub>3</sub>), 0.94(s, 3H, CH<sub>3</sub>); EIMS: 325 (M, 20.10); Anal. Calcd. for C<sub>21</sub>H<sub>27</sub>NO<sub>2</sub>: C, 77.50; H, 8.36; N, 4.30. Found: C, 77.90; H, 8.65; N, 3.95.

### Compound 5

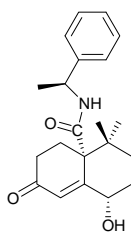

5

To a stirred solution of compound **4** (0.327 g, 1 mmol) in dry <sup>1</sup>PrOH (32 mL) at room temperature was added orthoformic acid triisopropyl ester (0.27 mL, 2.58 mmol) and *p*-TsOH•H<sub>2</sub>O (38 mg, 0.2 mmol) in turn. The mixture was stirred at 40 °C for 3 hrs. To the reaction solution was added EtOAc (70 mL) and water (20 mL) and the organic phase was separated. The aqueous phase was extracted with EtOAc (3 × 20 mL) and the combined organic phases were washed with brine (20 mL), dried over anhydrous Na<sub>2</sub>SO<sub>4</sub> and filtered. The filtrate was evaporated *in vacuo* and the residue was purified by column chromatography (silica gel, petroleum:EtOAc 3:1) to yield **5** (0.299 g, 87%) as a white solid. Crystals suitable for X-ray crystallographic analysis were grown in a mixture of EtOAc and hexane.

**5**: as a white solid. m.p.: 211-218 °C;  $[\alpha]_D^{26} = -142.39$  (c, 0.36, CHCl<sub>3</sub>); IR (KBr)  $\nu_{\text{max}}$  3344, 3240, 3060, 1685, 1633 cm<sup>-1</sup>; <sup>1</sup>HNMR:  $\delta = 8.73$  (d,  $J = 6.6\text{Hz}$ , 1H, -NH-), 7.17-7.27 (m, 5H, C<sub>6</sub>H<sub>5</sub>), 6.03 (s, 1H, CH=), 5.12 (s, 1H, -OH), 5.06 (dt,  $J = 6.9, 7.2\text{Hz}$ , 1H, PhCH), 4.34 (s, 1H, -CH-O-), 2.48 (dt,  $J = 13.2, 3.3\text{Hz}$ , 1H), 2.28-2.33 (m, 2H), 2.12 (dt,  $J = 13.8, 3\text{Hz}$ , 1H), 2.00 (dt,  $J = 12.6, 4.2\text{Hz}$ , 1H), 1.91 (dt,  $J = 10.4, 3.3\text{Hz}$ , 1H), 1.82 (dt,  $J = 10.8, 2.1\text{Hz}$ , 1H), 1.45 (d,  $J = 7.2\text{Hz}$ , 3H, CH<sub>3</sub>-C-N), 1.24 (d,  $J = 12.9\text{Hz}$ , 1H), 0.98 (s, 3H, CH<sub>3</sub>), 0.89 (s, 3H, CH<sub>3</sub>); <sup>13</sup>CNMR (75 MHz):  $\delta = 200.2, 169.7, 160.1, 143.7, 133.1, 128.7$ (2C), 127.3, 126.0(2C), 70.9, 56.4, 50.2, 36.1, 35.9, 32.4, 29.8, 28.6, 27.2, 25.4, 22.4; ESIMS: 342 (M+H<sup>+</sup>); HRMS: 364.1899 (M+Na<sup>+</sup>).

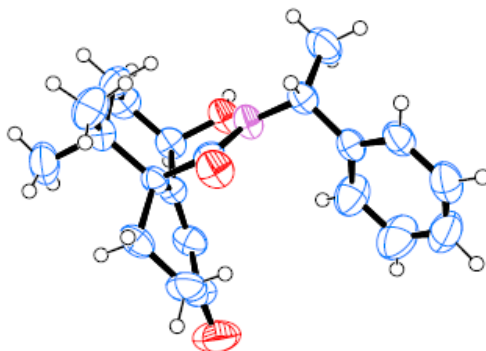

**Table 1.** Crystal data and structure refinement for **5**

|                                   |                                                                                                               |
|-----------------------------------|---------------------------------------------------------------------------------------------------------------|
| Empirical formula                 | C <sub>21</sub> H <sub>27</sub> NO <sub>3</sub>                                                               |
| Formula weight                    | 341.44                                                                                                        |
| Temperature                       | 293(2) K                                                                                                      |
| Wavelength                        | 0.71073 Å                                                                                                     |
| Crystal system, space group       | Orthorhombic, P2(1)2(1)2(1)                                                                                   |
| Unit cell dimensions              | a = 11.4805 (10) Å $\alpha$ = 90 °<br>b = 11.8426 (10) Å $\beta$ = 90 °<br>c = 14.1986 (12) Å $\gamma$ = 90 ° |
| Volume                            | 1930.4 (3) Å <sup>3</sup>                                                                                     |
| Z, calculated density             | 4, 1.171 Mg/m <sup>3</sup>                                                                                    |
| Absorption coefficient            | 0.078 mm <sup>-1</sup>                                                                                        |
| F (000)                           | 732                                                                                                           |
| Theta range for data collection   | 2.24 to 28.26 °                                                                                               |
| Limiting indices                  | -14 ≤ h ≤ 14, -14 ≤ k ≤ 15, -16 ≤ l ≤ 18                                                                      |
| Reflections collected/unique      | 11865 / 4489 [R(int) = 0.0775]                                                                                |
| Completeness to theta = 28.26     | 96.0%                                                                                                         |
| Absorption correction             | Empirical                                                                                                     |
| Max. and min. transmission        | 1.00000 and 0.75955                                                                                           |
| Refinement method                 | Full-matrix least-squares on F <sup>2</sup>                                                                   |
| Data/restraints/parameters        | 4489/ 2 /266                                                                                                  |
| Goodness-of-fit on F <sup>2</sup> | 0.701                                                                                                         |
| Final R indices [I > 2σ(I)]       | R1 = 0.0454, wR2 = 0.0734                                                                                     |
| R indices (all data)              | R1 = 0.1130, wR2 = 0.0856                                                                                     |
| Absolute structure parameter      | 1.1 (15)                                                                                                      |
| Extinction coefficient            | 0.0046 (6)                                                                                                    |
| Largest diff. peak and hole       | 0.209 and -0.103 e. Å <sup>-3</sup>                                                                           |

### Compound 8

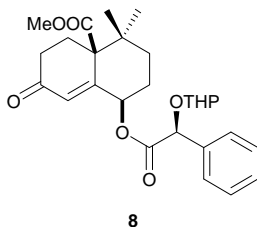

To a stirred solution of compound **7** (4.00 g, 15.86 mmol), *O*-tetrahydropyranyl-*S*-mandelic acid (4.97 g, 21 mmol) and 4-dimethylaminopyridine (48 mg, 0.39 mmol) in dry CH<sub>2</sub>Cl<sub>2</sub> (76 mL) under ice bath was added *N,N'*-dicyclohexylcarbodiimide (4.37 g, 21 mmol) in one portion, and the mixture was stirred at 0°C for 2.7 hrs and then filtered. The filtrate was concentrated under vacuum and the residue was purified by column chromatography (silica gel, petroleum:EtOAc 8:1) to yield compound **8** (6.36 g, 85%) as a colorless oil.

**8:**  $R_f = 0.45$  (silica gel, Petroleum: EtOAc 3:1); IR (neat)  $\nu$  3065, 3033, 2951, 2875, 1739, 1684, 1635, 1496, 1455, 1392, 1370, 766, 726, 702  $\text{cm}^{-1}$ ;  $^1\text{H NMR}$ :  $\delta = 7.31\text{--}7.48$  (m, 5H,  $-\text{C}_6\text{H}_5$ ), 6.05 (s) and 6.23 (s, 1H,  $-\text{CH}=\text{C}-$ ), 5.47–5.56 (m, 1H,  $\text{O}=\text{C}-\text{C}=\text{C}-\text{CH}-$ ), 5.10 (s), 5.13 (s), 5.22 (s) and 5.27 (s, 1H,  $\text{C}_6\text{H}_5-\text{CH}-$ ), 4.53 (s), 4.60 (s), 4.83 (s) and 4.87 (s, 1H,  $-\text{O}-\text{CH}-\text{O}-$ ), 3.64–3.69 (m) and 3.86–3.96 (m, 1H,  $-\text{O}-\text{CHH}-$ ), 3.44–3.52 (m, 1H,  $-\text{O}-\text{CHH}-$ ), 3.42 (s), 3.56 (s), 3.71 (s) and 3.74 (s, 3H,  $-\text{COOCH}_3$ ), 2.52–2.79 (m, 1H), 2.34–2.47 (m, 1H), 2.12–2.31 (m, 2H), 1.92–2.06 (m, 1H), 1.73–1.92 (m, 3H), 1.66–1.73 (m, 1H), 1.42–1.59 (m, 3H), 1.24–1.32 (m, 2H), 1.13 (s), 1.16 (s) and 1.20 (s, 3H,  $-\text{CH}_3$ ), 0.88 (s) and 0.91 (s, 3H,  $-\text{CH}_3$ ); EIMS: 251 (M-PhCH(OTHP)CO, 0.27), 235 (M-PhCH(OTHP)COO or PhCH(OTHP)COO, 12.03), 107 ( $\text{C}_7\text{H}_7\text{OH}$ , 100), 91 ( $\text{C}_7\text{H}_7$ , 21.55), 85 (THP, 37.35); ESIMS: 488 ( $\text{M}+\text{NH}_4^+$ ); HRMS: 493.2196745 ( $\text{M}+\text{Na}^+$ ); Anal. Calcd. for  $\text{C}_{27}\text{H}_{34}\text{O}_7$ : C, 68.92; H, 7.28. Found: C, 68.97; H, 7.44.

### Compound 9 and 9'

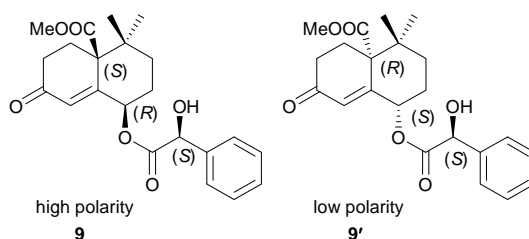

To a stirred solution of compound **8** (1.95 g, 4.14 mmol) in absolute MeOH (13 mL) was added *p*-TsOH $\cdot$ H<sub>2</sub>O (13 mg, 0.068 mmol) in one portion at ambient temperature, and the solution was stirred at ambient temperature for 2.4 hrs. To the reaction solution was added EtOAc (50 mL) and water (20 mL) and the organic phase was separated. The aqueous phase was extracted with EtOAc (3  $\times$  30 mL) and the combined organic phases were washed with water (20 mL), brine (20 mL), dried over anhydrous Na<sub>2</sub>SO<sub>4</sub> and filtered. The filtrate was evaporated *in vacuo* and the residue was purified by column chromatography (silica gel, petroleum:EtOAc 5:1) to yield a mixture of compound **9** and **9'** (1.5 g) as a colorless oil. Column chromatography resolution (silica gel, petroleum:EtOAc 5:1 to 4:1) gave compound **9** (0.58 g, 36%), **9'** (0.60 g, 38%) and their mixture (0.17 g, 11%).

**9:** Slowly solidified as a white solid when standing at room temperature. m.p.: 89–90 °C;  $R_f = 0.18$  (silica gel, Petroleum: EtOAc 3:1);  $[\alpha]_D^{24} = +132.4$  (*c* 0.98, CHCl<sub>3</sub>); de%: 93.8%; ee%: 83.6%; IR (KBr)  $\nu_{\text{max}}$  3474, 3034, 30007, 2967, 1741, 1729, 1682, 1638, 1493, 1459, 767, 747  $\text{cm}^{-1}$ ;  $^1\text{H NMR}$ :  $\delta = 7.32\text{--}7.44$  (m, 5H,  $-\text{C}_6\text{H}_5$ ), 6.27 (s, 1H,  $-\text{CH}=\text{C}-$ ), 5.46 (s, 1H,  $\text{O}=\text{C}-\text{C}=\text{C}-\text{CH}-$ ), 5.09 (d, *J* = 6.0 Hz, 1H,  $\text{C}_6\text{H}_5-\text{CH}-$ ), 3.72 (s, 3H,  $-\text{COOCH}_3$ ), 3.50 (d, *J* = 5.7 Hz, 1H,  $-\text{OH}$ ), 2.62–2.73 (m, 1H), 2.40–2.47 (m, 1H), 2.08–2.33 (m, 3H), 1.82–1.96 (m, 1H), 1.54–1.60 (m, 1H), 1.26–1.42 (m, 1H), 1.20 (s, 3H,  $-\text{CH}_3$ ), 0.91 (s, 3H,  $-\text{CH}_3$ ); EIMS: 252 ( $\text{M}+1-\text{PhCH}(\text{OH})\text{CO}$ , 0.65), 236 ( $\text{M}+1-\text{PhCH}(\text{OH})\text{COO}$ , 17.53), 107 ( $\text{C}_7\text{H}_7\text{OH}^+$ , 100), 91 ( $\text{C}_7\text{H}_7^+$ , 15.57); ESIMS: 404 ( $\text{M}+\text{NH}_4^+$ ); HRMS: 409.1621597 ( $\text{M}+\text{Na}^+$ ); Anal. Calcd. for  $\text{C}_{22}\text{H}_{26}\text{O}_6$ : C, 68.38; H, 6.78. Found: C, 68.13; H, 6.76.

**9':**  $R_f = 0.22$  (silica gel, Petroleum: EtOAc 3:1);  $[\alpha]_D^{24} = -58.0$  (*c* 1.13, CHCl<sub>3</sub>); de%: 98.5%; ee%: 95.5%; IR (neat)  $\nu_{\text{max}}$  3488, 3064, 3033, 2955, 2877, 1734, 1683, 1604, 1496, 1455, 1394, 1372, 766, 733, 699  $\text{cm}^{-1}$ ;  $^1\text{H NMR}$  (300 MHz, CDCl<sub>3</sub>)  $\delta = 7.30\text{--}7.43$  (m, 5H,  $-\text{C}_6\text{H}_5$ ), 6.16 (s, 1H,  $-\text{CH}=\text{C}-$ ), 5.58 (s, 1H,  $\text{O}=\text{C}-\text{C}=\text{C}-\text{CH}-$ ), 5.19 (d, *J* = 6.0 Hz, 1H,  $\text{C}_6\text{H}_5-\text{CH}-$ ), 3.64 (d, *J* = 6.3 Hz, 1H,  $-\text{OH}$ ), 3.51 (s, 3H,  $-\text{COOCH}_3$ ), 2.29–2.64 (m, 4H), 1.93–2.09 (m, 2H), 1.80–1.86 (m, 1H), 1.26–1.32 (m, 1H), 1.13 (s, 3H,  $-\text{CH}_3$ ), 0.94 (s, 3H,  $-\text{CH}_3$ ); ESIMS: 404

(M+NH<sub>4</sub><sup>+</sup>); HRMS: 409.1621597 (M+Na<sup>+</sup>); Anal. Calcd. for C<sub>22</sub>H<sub>26</sub>O<sub>6</sub>: C, 68.38; H, 6.78. Found: C, 68.04; H, 6.89.

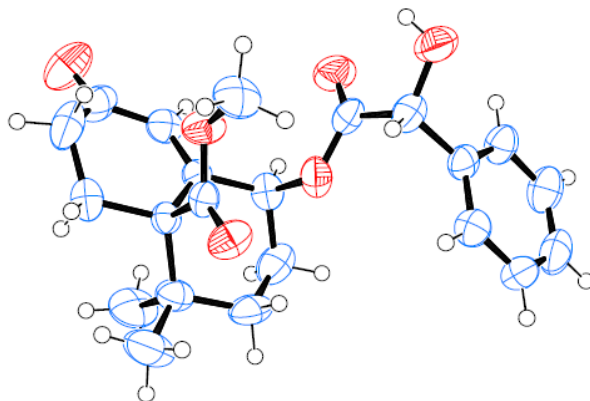

**Table 2.** Crystal data and structure refinement for **9/9'**

|                                   |                                                                                                  |
|-----------------------------------|--------------------------------------------------------------------------------------------------|
| Empirical formula                 | C <sub>22</sub> H <sub>26</sub> O <sub>6</sub>                                                   |
| Formula weight                    | 386.43                                                                                           |
| Temperature                       | 293(2) K                                                                                         |
| Wavelength                        | 0.71073 Å                                                                                        |
| Crystal system, space group       | Monoclinic, Pn                                                                                   |
| Unit cell dimensions              | a = 10.5615 (12) Å α = 90 °<br>b = 8.3727 (9) Å β = 108.972 (2) °<br>c = 11.8537 (12) Å γ = 90 ° |
| Volume                            | 991.26 (18) Å <sup>3</sup>                                                                       |
| Z, calculated density             | 2, 1.295 Mg/m <sup>3</sup>                                                                       |
| Absorption coefficient            | 0.094 mm <sup>-1</sup>                                                                           |
| F (000)                           | 412                                                                                              |
| Theta range for data collection   | 2.25 to 27.00 °                                                                                  |
| Limiting indices                  | -13 ≤ h ≤ 13, -10 ≤ k ≤ 8, -11 ≤ l ≤ 15                                                          |
| Reflections collected/unique      | 5692 / 2159 [R(int) = 0.0680]                                                                    |
| Completeness to theta = 27.00     | 99.4%                                                                                            |
| Absorption correction             | Empirical                                                                                        |
| Max. and min. transmission        | 1.00000 and 0.76531                                                                              |
| Refinement method                 | Full-matrix least-squares on F <sup>2</sup>                                                      |
| Data/restraints/parameters        | 2159/ 2 /257                                                                                     |
| Goodness-of-fit on F <sup>2</sup> | 0.764                                                                                            |
| Final R indices [I > 2σ(I)]       | R1 = 0.0399, wR2 = 0.0516                                                                        |
| R indices (all data)              | R1 = 0.0790, wR2 = 0.0581                                                                        |
| Absolute structure parameter      | 10 (10)                                                                                          |
| Largest diff. peak and hole       | 0.116 and -0.123 e. Å <sup>-3</sup>                                                              |

### Compound (+)-10 and (-)-10

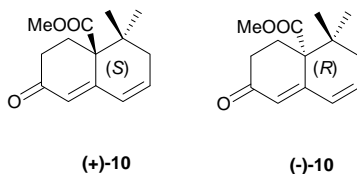

To a stirred solution of compound **9'** (1.76 g, 4.57 mmol) in dry 1,4-dioxane (30 mL) was added Et<sub>3</sub>N (0.79 mL, 5.48 mmol) and Pd(PPh<sub>3</sub>)<sub>4</sub> (0.26 g, 0.23 mmol) in turn at ambient temperature, and the solution was stirred at 75°C for 1.5 hrs. To the reaction solution was added EtOAc (100mL) and water (30mL) and the organic phase was separated. The aqueous phase was extracted with EtOAc (3 × 50mL) and the combined organic phases were washed with water (20mL), brine (20mL), dried over anhydrous Na<sub>2</sub>SO<sub>4</sub> and filtered. The filtrate was evaporated *in vacuo* and the residue was purified by column chromatography (silica gel, petroleum:EtOAc 8:1) to yield compound **(-)-10** (0.84 g, 79%) as a pale yellow oil.

**(-)-10**:  $[\alpha]_D^{24} = -213.4$  (*c* 1.08, CHCl<sub>3</sub>); e.e.: 93.0%; <sup>1</sup>H NMR:  $\delta = 6.30$  (dd, *J* = 9.9, 2.4Hz, 1H, O=C-C=C-CH=), 6.20 (ddd, *J* = 9.9, 6.0, 2.1Hz, 1H, O=C-C=C-C=CH-), 5.86 (s, 1H, O=C-CH=), 3.68 (s, 3H, -COOCH<sub>3</sub>), 1.9-2.6 (m, 6H), 1.07 (s, 3H, CH<sub>3</sub>), 0.96 (s, 3H, CH<sub>3</sub>).

Compound **9** (1.48 g, 3.83 mmol) was converted into compound **(+)-10** (0.75 g, 84%) as a pale yellow oil.

**(+)-10**:  $[\alpha]_D^{24} = +183.1$  (*c* 1.15, CHCl<sub>3</sub>); e.e.: 80.9%. <sup>1</sup>H NMR:  $\delta = 6.27$ -6.34 (m, 1H, O=C-C=C-CH=), 6.15-6.23 (m, 1H, O=C-C=C-C=CH-), 5.86 (s, 1H, O=C-CH=), 3.68 (s, 3H, -COOCH<sub>3</sub>), 1.9-2.6 (m, 6H), 1.07 (s, 3H, CH<sub>3</sub>), 0.96 (s, 3H, CH<sub>3</sub>).

### (+)-Spiniferin-1

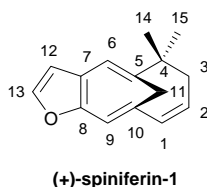

To a solution of **11a** (1.16 g, 3.07 mmol) in THF (12 mL) was added TsOH (58 mg). The solution was refluxed for 40 minutes under oxygen-free atmosphere, then LiAlH<sub>4</sub> (408 mg, 10.75 mmol) and additional THF (12 mL) was added directly. After stirring for 1.8 hour at 40°C, the reaction mixture was quenched with wet Na<sub>2</sub>SO<sub>4</sub>, filtered and washed with THF (3 x 8 mL). The filtrate was concentrated *in vacuo* and the residue was dissolved in THF (12 mL). DBU (1.5 mL, 10.13 mmol) was added in one portion at 0 °C then CF<sub>3</sub>CF<sub>2</sub>CF<sub>2</sub>CF<sub>2</sub>SO<sub>2</sub>F (3.06 g, 10.13 mmol) was added dropwise at 0 °C. After the addition the reaction mixture was stirred at 0 °C for 5 minutes, then at room temperature for 10 mins. TLC showed the reaction was complete. The reaction mixture was concentrated *in vacuo* and silica gel chromatography of the crude mixture (99:1 petrol ether : ethyl acetate) afforded **(+)-Spiniferin-1** (230 mg, 35% in 3 steps) as a colorless oil, which solidified as a white solid when standing in the freezer.

**(+)-Spiniferin-1**: m.p.: 65-75 °C;  $[\alpha]_D^{28} = +375.0$  (*c* 1.01, CHCl<sub>3</sub>); e.e.: 80.6%; IR (neat)  $\nu_{\max}$  3112, 3013, 1604, 1467, 1268, 1087, 811 746 cm<sup>-1</sup>; <sup>1</sup>H NMR:  $\delta = 7.28$  (d, *J* = 2.1Hz, 1H, 13-H), 6.52 (d, *J* = 1.8Hz, 1H, 12-H), 6.33 (s, 1H, 6-H or 9-H), 6.30 (s, 1H, 9-H or 6-H), 6.22 (dd, *J* = 3.3, 11.4Hz, 1H, 1-H), 5.32 (ddd, *J* = 3.9, 9.0, 12.6Hz,



1H, 2-H), 3.56 (d,  $J = 10.8\text{Hz}$ , 1H, 11-H), 2.77 (dt,  $J = 16.2, 3.3\text{Hz}$ , 1H, 3-H), 1.98 (dd,  $J = 9.0, 16.5\text{Hz}$ , 1H, 3-H), 1.33 (s, 3H, 15-H), 0.72 (s, 3H, 14-H), 0.68 (d,  $J = 11.1\text{Hz}$ , 1H, 11-H);  $^{13}\text{CNMR}$  (75MHz):  $\delta = 153.3$  (s, 8-C), 141.3 (s, 13-C), 131.9 (s, 10-C), 130.4 (s, 1-C), 127.6 (s, 5-C), 125.3 (s, 2-C), 118.8 (s, 7-C), 112.6 (s, 9-C), 110.1 (s, 12-C), 109.5 (s, 6-C), 44.4 (s, 3-C), 39.8 (s, 4-C), 34.2 (s, 11-C), 30.9 (s, 15-C), 28.4 (s, 14-C); EIMS: 212 (M, 100); Anal. Calcd. for  $\text{C}_{15}\text{H}_{16}\text{O}$ : C, 84.87; H, 7.60. Found: C, 85.02; H, 7.77.

**(-)-Spiniferin-1:**

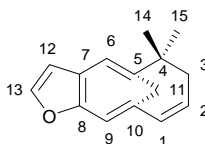

**(-)-spiniferin-1**

**11b** (0.375 g, 1 mmol) was converted into **(-)-Spiniferin-1** (0.065 g, 31%) as a colorless oil via three steps, which solidified as a white solid when standing in the freezer.

**(-)-Spiniferin-1:** m.p.: 71-76 °C;  $[\alpha]_{\text{D}}^{28} = -432.0$  ( $c$  1.06,  $\text{CHCl}_3$ ); e.e.: 90.8%; IR (neat)  $\nu_{\text{max}}$  3112, 3014, 1604, 1467, 1268, 1087, 811 746  $\text{cm}^{-1}$ ;  $^1\text{HNMR}$ :  $\delta = 7.28$  (d,  $J = 2.1\text{Hz}$ , 1H, 13-H), 6.52 (d,  $J = 2.1\text{Hz}$ , 1H, 12-H), 6.33 (s, 1H, 6-H or 9-H), 6.30 (s, 1H, 9-H or 6-H), 6.23 (m, 1H, 1-H), 5.32 (ddd,  $J = 3.9, 9.0, 12.3\text{Hz}$ , 1H, 2-H), 3.56 (d,  $J = 10.5\text{Hz}$ , 1H, 11-H), 2.78 (dt,  $J = 3.6, 16.5\text{Hz}$ , 1H, 3-H), 1.97 (dd,  $J = 9.0, 16.8\text{Hz}$ , 1H, 3-H), 1.34 (s, 3H, 15-H), 0.73 (s, 3H, 14-H), 0.68 (d,  $J = 10.5\text{Hz}$ , 1H, 11-H);  $^{13}\text{CNMR}$  (75MHz):  $\delta = 153.3$  (s, 8-C), 141.3 (s, 13-C), 131.9 (s, 10-C), 130.4 (s, 1-C), 127.6 (s, 5-C), 125.3 (s, 2-C), 118.8 (s, 7-C), 112.6 (s, 9-C), 110.1 (s, 12-C), 109.5 (s, 6-C), 44.4 (s, 3-C), 39.8 (s, 4-C), 34.2 (s, 11-C), 30.9 (s, 15-C), 28.4 (s, 14-C); EIMS: 212 (M, 43.14); Anal. Calcd. for  $\text{C}_{15}\text{H}_{16}\text{O}$ : C, 84.87; H, 7.60. Found: C, 84.46; H, 7.61.

## Chiral HPLC data

### 1. Compound 9 and 9'

HPLC analysis of 9 and 9': column: Chiral AD; mobile phase: hexane / *iso*-propanol = 80 / 20; flow rate: 0.80 mL / min; detection: UV 214 nm; *t* for 9: 23.5 min; *t* for *ent*-9: 19.3 min; *t* for 9': 14.0 min; *t* for *ent*-9': 18.8 min.

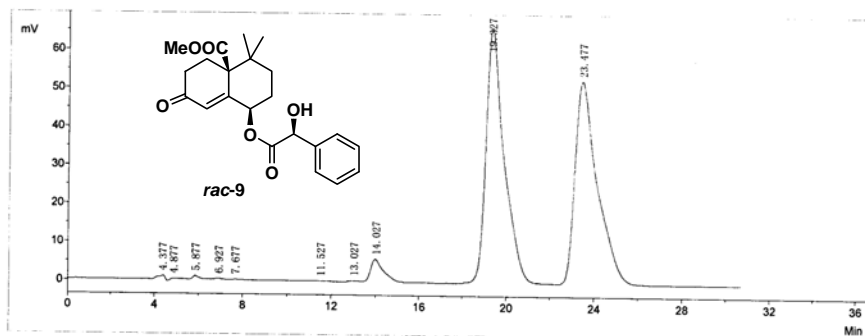

| 序号  | 峰号 | 组份名 | 保留时间   | 峰高       | 峰面积       | 面积百分比(%) |
|-----|----|-----|--------|----------|-----------|----------|
| 1   | 1  |     | 4.377  | 1143.9   | 25596.0   | 0.3257   |
| 2   | 2  |     | 4.877  | 400.3    | 8149.0    | 0.1037   |
| 3   | 3  |     | 5.877  | 769.9    | 13516.5   | 0.1720   |
| 4   | 4  |     | 6.927  | 245.0    | 5714.6    | 0.0727   |
| 5   | 5  |     | 7.677  | 131.6    | 2773.8    | 0.0353   |
| 6   | 6  |     | 11.527 | 60.0     | 5195.3    | 0.0661   |
| 7   | 7  |     | 13.027 | 256.7    | 7125.1    | 0.0907   |
| 8   | 8  |     | 14.027 | 5802.5   | 240101.6  | 3.0551   |
| 9   | 9  |     | 19.327 | 66217.8  | 3841101.2 | 48.8749  |
| 10  | 10 |     | 23.477 | 52578.4  | 3709768.7 | 47.2038  |
| 合计: |    |     |        | 127606.0 | 7859041.8 | 100.0000 |

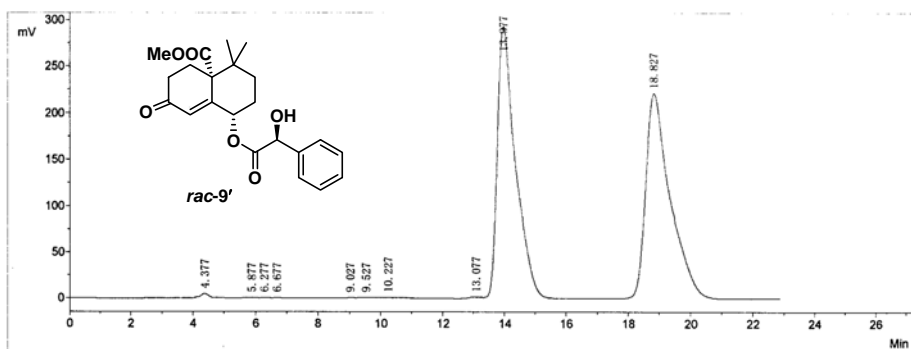

| 序号  | 峰号 | 组份名 | 保留时间   | 峰高       | 峰面积        | 面积百分比(%) |
|-----|----|-----|--------|----------|------------|----------|
| 1   | 1  |     | 4.377  | 4625.4   | 100562.2   | 0.4148   |
| 2   | 2  |     | 5.877  | 750.0    | 20394.0    | 0.0841   |
| 3   | 3  |     | 6.277  | 461.9    | 9613.9     | 0.0397   |
| 4   | 4  |     | 6.677  | 427.2    | 11867.4    | 0.0489   |
| 5   | 5  |     | 9.027  | 344.8    | 7214.0     | 0.0298   |
| 6   | 6  |     | 9.527  | 711.2    | 17599.9    | 0.0726   |
| 7   | 7  |     | 10.227 | 685.3    | 42992.2    | 0.1773   |
| 8   | 8  |     | 13.077 | 1553.5   | 34584.0    | 0.1426   |
| 9   | 9  |     | 13.977 | 292710.9 | 11937763.9 | 49.2363  |
| 10  | 10 |     | 18.827 | 220547.3 | 12063286.6 | 49.7540  |
| 合计: |    |     |        | 522817.5 | 24245878.1 | 100.0000 |

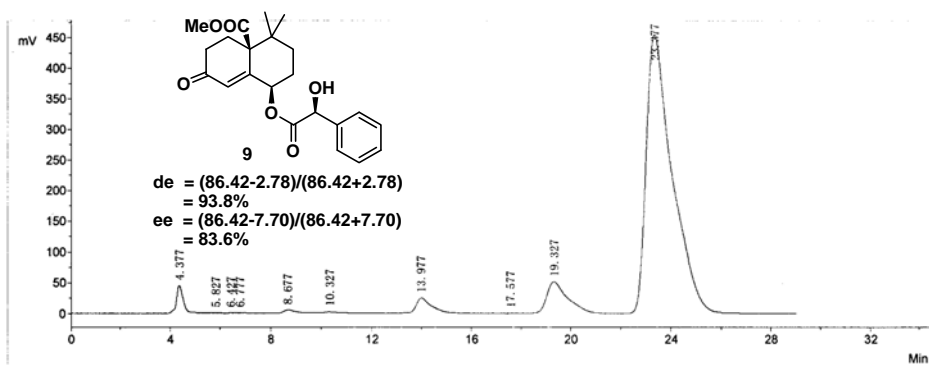

| 序号  | 峰号 | 组份名 | 保留时间   | 峰高       | 峰面积        | 面积百分比(%) |
|-----|----|-----|--------|----------|------------|----------|
| 1   | 1  |     | 4.377  | 44783.8  | 896478.8   | 2.3852   |
| 2   | 2  |     | 5.827  | 351.2    | 5657.7     | 0.0151   |
| 3   | 3  |     | 6.427  | 264.3    | 3710.8     | 0.0099   |
| 4   | 4  |     | 6.777  | 521.1    | 13690.6    | 0.0364   |
| 5   | 5  |     | 8.677  | 4955.4   | 161858.9   | 0.4307   |
| 6   | 6  |     | 10.327 | 1929.9   | 77368.7    | 0.2059   |
| 7   | 7  |     | 13.977 | 24374.0  | 1045274.5  | 2.7811   |
| 8   | 8  |     | 17.577 | 168.4    | 5034.2     | 0.0134   |
| 9   | 9  |     | 19.327 | 50846.6  | 2895709.1  | 7.7045   |
| 10  | 10 |     | 23.377 | 454030.6 | 32479997.9 | 86.4180  |
| 合计: |    |     |        | 582225.4 | 37584781.2 | 100.0000 |

The estimated ee of (+)-**10** prepared from **9** is calculated to be 78.4% ( $0.938 \times 0.836$ ).

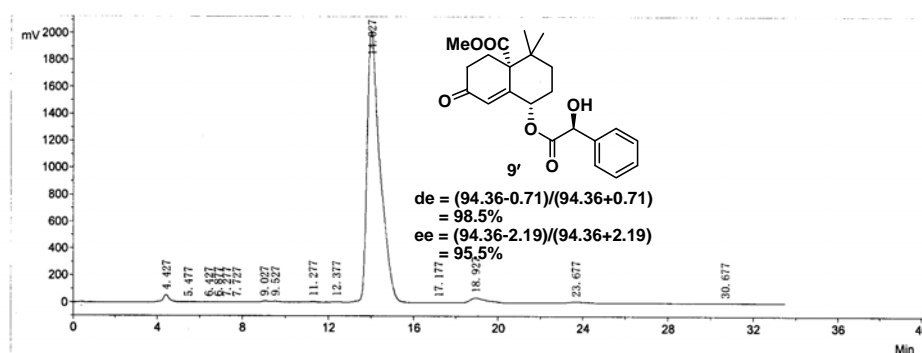

| 序号  | 峰号 | 组份名 | 保留时间   | 峰高        | 峰面积        | 面积百分比(%) |
|-----|----|-----|--------|-----------|------------|----------|
| 1   | 1  |     | 4.427  | 54180.7   | 1181078.3  | 1.3081   |
| 2   | 2  |     | 5.477  | 2136.6    | 88059.9    | 0.0975   |
| 3   | 3  |     | 6.427  | 1672.8    | 34889.5    | 0.0386   |
| 4   | 4  |     | 6.877  | 1102.0    | 26640.3    | 0.0295   |
| 5   | 5  |     | 7.277  | 1104.2    | 23153.8    | 0.0256   |
| 6   | 6  |     | 7.727  | 1123.1    | 35386.9    | 0.0392   |
| 7   | 7  |     | 9.027  | 10227.6   | 257083.4   | 0.2847   |
| 8   | 8  |     | 9.527  | 8327.3    | 293316.9   | 0.3249   |
| 9   | 9  |     | 11.277 | 5593.1    | 198689.4   | 0.2201   |
| 10  | 10 |     | 12.377 | 6305.6    | 216186.1   | 0.2394   |
| 11  | 11 |     | 14.027 | 2016941.7 | 85200656.6 | 94.3653  |
| 12  | 12 |     | 17.177 | 1007.4    | 43438.3    | 0.0481   |
| 13  | 13 |     | 18.927 | 35931.4   | 1978879.9  | 2.1917   |
| 14  | 14 |     | 23.677 | 8933.9    | 638273.3   | 0.7069   |
| 15  | 15 |     | 30.677 | 878.4     | 72408.7    | 0.0802   |
| 合计: |    |     |        | 2155465.7 | 90288141.3 | 100.0000 |

The estimated ee of (-)-**10** prepared from **9'** is calculated to be 94.1% ( $0.985 \times 0.955$ ).

## 2. Compound 10

**HPLC analysis of 10:** column: Chiralpak AD; mobile phase: hexane / *iso*-propanol = 90 / 10; flow rate: 0.80 mL / min; detection: UV 230 nm; *t* for (-)-10: 10.6 min; *t* for (+)-10: 12.1 min.

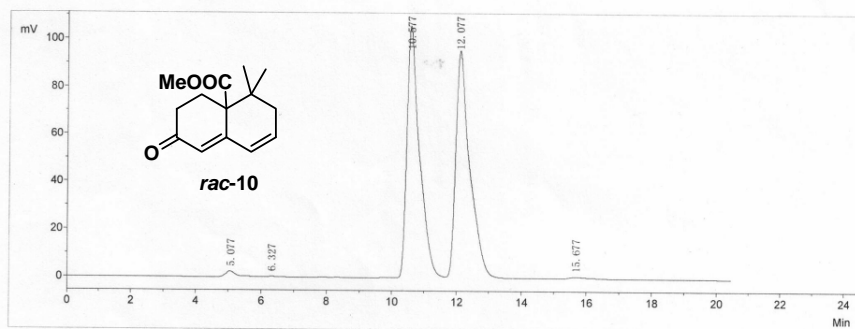

| 序号  | 峰号 | 组份名 | 保留时间   | 峰高       | 峰面积       | 面积百分比(%) |
|-----|----|-----|--------|----------|-----------|----------|
| 1   | 1  |     | 5.077  | 2361.8   | 52600.2   | 0.8992   |
| 2   | 2  |     | 6.327  | 268.3    | 6337.2    | 0.1083   |
| 3   | 3  |     | 10.577 | 104842.5 | 2871849.8 | 49.0925  |
| 4   | 4  |     | 12.077 | 94921.8  | 2886354.3 | 49.3404  |
| 5   | 5  |     | 15.677 | 813.9    | 32736.3   | 0.5596   |
| 合计: |    |     |        | 203208.2 | 5849877.9 | 100.0000 |

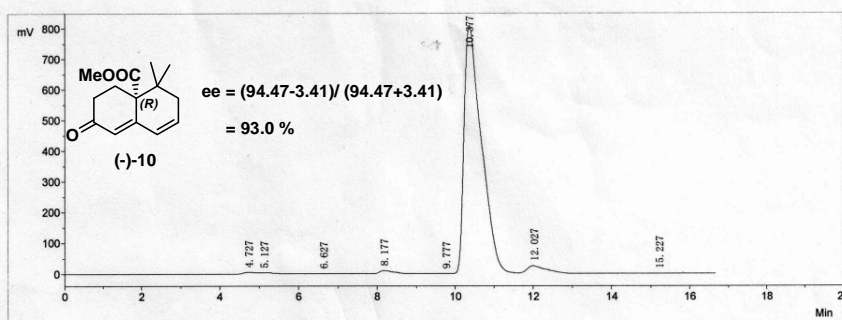

| 序号  | 峰号 | 组份名 | 保留时间   | 峰高       | 峰面积        | 面积百分比(%) |
|-----|----|-----|--------|----------|------------|----------|
| 1   | 1  |     | 4.727  | 5684.4   | 114290.9   | 0.4321   |
| 2   | 2  |     | 5.127  | 3749.6   | 141949.0   | 0.5366   |
| 3   | 3  |     | 6.627  | 558.2    | 11437.1    | 0.0432   |
| 4   | 4  |     | 8.177  | 10619.8  | 262857.5   | 0.9937   |
| 5   | 5  |     | 9.777  | 977.5    | 18130.5    | 0.0685   |
| 6   | 6  |     | 10.377 | 807770.9 | 24990248.0 | 94.4710  |
| 7   | 7  |     | 12.027 | 24925.4  | 901311.3   | 3.4072   |
| 8   | 8  |     | 15.227 | 287.0    | 12594.4    | 0.0476   |
| 合计: |    |     |        | 854572.7 | 26452818.8 | 100.0000 |

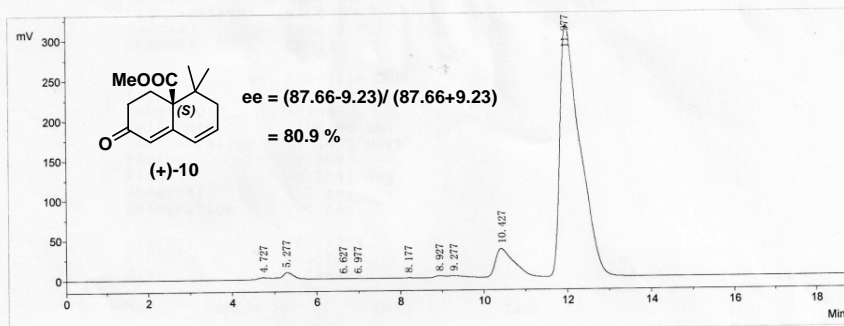

| 序号  | 峰号 | 组份名 | 保留时间   | 峰高       | 峰面积        | 面积百分比(%) |
|-----|----|-----|--------|----------|------------|----------|
| 1   | 1  |     | 4.727  | 2482.2   | 50397.1    | 0.4232   |
| 2   | 2  |     | 5.277  | 8508.9   | 178871.0   | 1.5020   |
| 3   | 3  |     | 6.627  | 282.6    | 4599.0     | 0.0386   |
| 4   | 4  |     | 6.977  | 360.9    | 8665.0     | 0.0728   |
| 5   | 5  |     | 8.177  | 453.9    | 10527.9    | 0.0884   |
| 6   | 6  |     | 8.927  | 2665.2   | 47806.6    | 0.4014   |
| 7   | 7  |     | 9.277  | 2669.2   | 68900.4    | 0.5786   |
| 8   | 8  |     | 10.427 | 35741.8  | 1099732.7  | 9.2348   |
| 9   | 9  |     | 11.977 | 313491.1 | 10439052.9 | 87.6601  |
| 合计: |    |     |        | 366655.8 | 1190852.7  | 100.0000 |

The ee of (+)-**10** and (-)-**10** (80.9% and 93.0% respectively) are nearly consistent with the calculated ee of 78.4% and 94.1% based on the optical purity of **9** and **9'**, indicating no further racemization in Pd(PPh<sub>3</sub>)<sub>4</sub>-catalyzed β-H elimination reaction.

### 3. Spiniferin-1

**HPLC analysis of Spiniferin-1:** column: Nucleocel Delta S; mobile phase: hexane / *iso*-propanol = 100 / 1; flow rate: 0.30 mL / min; detection: UV 254 nm; *t* for pR(-)-enantiomer: 14.1 min; *t* for pS(+)-enantiomer: 15.3 min.

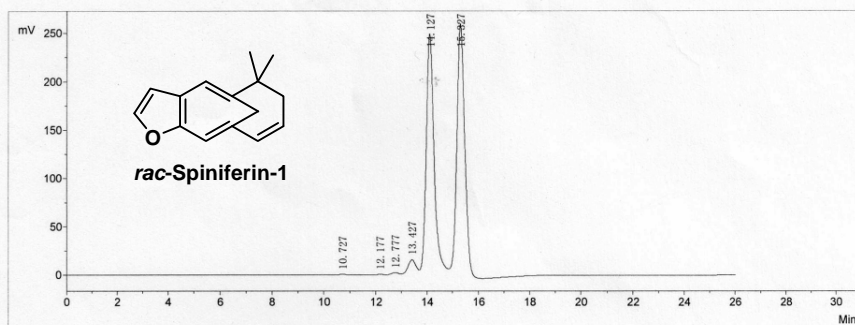

| 序号  | 峰号 | 组份名 | 保留时间   | 峰高       | 峰面积        | 面积百分比(%) |
|-----|----|-----|--------|----------|------------|----------|
| 1   | 1  |     | 10.727 | 546.3    | 19085.3    | 0.1677   |
| 2   | 2  |     | 12.177 | 581.8    | 20271.5    | 0.1781   |
| 3   | 3  |     | 12.777 | 2364.9   | 50095.1    | 0.4402   |
| 4   | 4  |     | 13.427 | 15695.5  | 343004.3   | 3.0140   |
| 5   | 5  |     | 14.127 | 245056.7 | 5350970.1  | 47.0191  |
| 6   | 6  |     | 15.327 | 257684.0 | 5596979.8  | 49.1808  |
| 合计: |    |     |        | 521929.2 | 11380406.1 | 100.0000 |

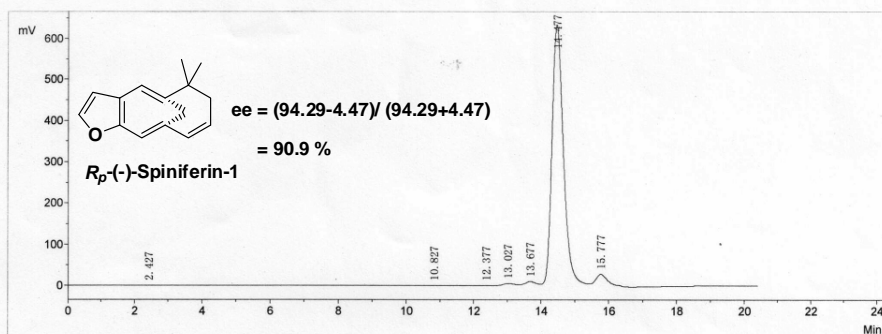

| 序号 | 峰号 | 组份名 | 保留时间   | 峰高       | 峰面积        | 面积百分比(%) |
|----|----|-----|--------|----------|------------|----------|
| 1  | 1  |     | 2.427  | 111.4    | 6679.2     | 0.0419   |
| 2  | 2  |     | 10.827 | 209.8    | 5992.3     | 0.0376   |
| 3  | 3  |     | 12.377 | 128.2    | 3353.4     | 0.0210   |
| 4  | 4  |     | 13.027 | 5168.2   | 112442.3   | 0.7050   |
| 5  | 5  |     | 13.677 | 9707.2   | 227307.6   | 1.4251   |
| 6  | 6  |     | 14.477 | 630353.7 | 14880157.2 | 93.2922  |
| 7  | 7  |     | 15.777 | 28514.1  | 714117.9   | 4.4772   |

合计: 674192.6 15950050.0 100.0000

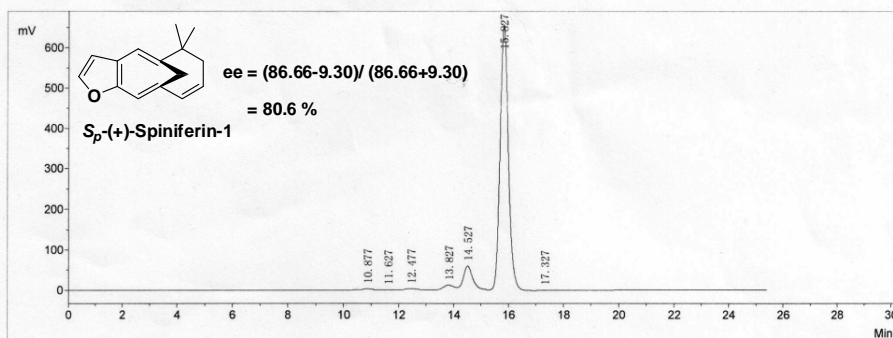

| 序号 | 峰号 | 组份名 | 保留时间   | 峰高       | 峰面积        | 面积百分比(%) |
|----|----|-----|--------|----------|------------|----------|
| 1  | 1  |     | 10.877 | 3037.9   | 87466.1    | 0.5498   |
| 2  | 2  |     | 11.627 | 1426.2   | 42180.3    | 0.2651   |
| 3  | 3  |     | 12.477 | 3988.1   | 145006.0   | 0.9114   |
| 4  | 4  |     | 13.827 | 12387.7  | 358265.7   | 2.2519   |
| 5  | 5  |     | 14.527 | 60476.5  | 1479316.1  | 9.2983   |
| 6  | 6  |     | 15.827 | 656894.5 | 13786906.7 | 86.6581  |
| 7  | 7  |     | 17.327 | 382.7    | 10396.5    | 0.0653   |

合计: 738593.6 15909537.4 100.0000

The ee of (+)-spiniferin-1 and (-)-spiniferin-1 (80.6% and 90.9% respectively) are nearly consistent with the ee of (+)-10 and (-)-10 (80.9% and 93.0% respectively), indicating no racemization in the last four steps to prepare final products.

## NMR spectra

### 1. Alcohol-2

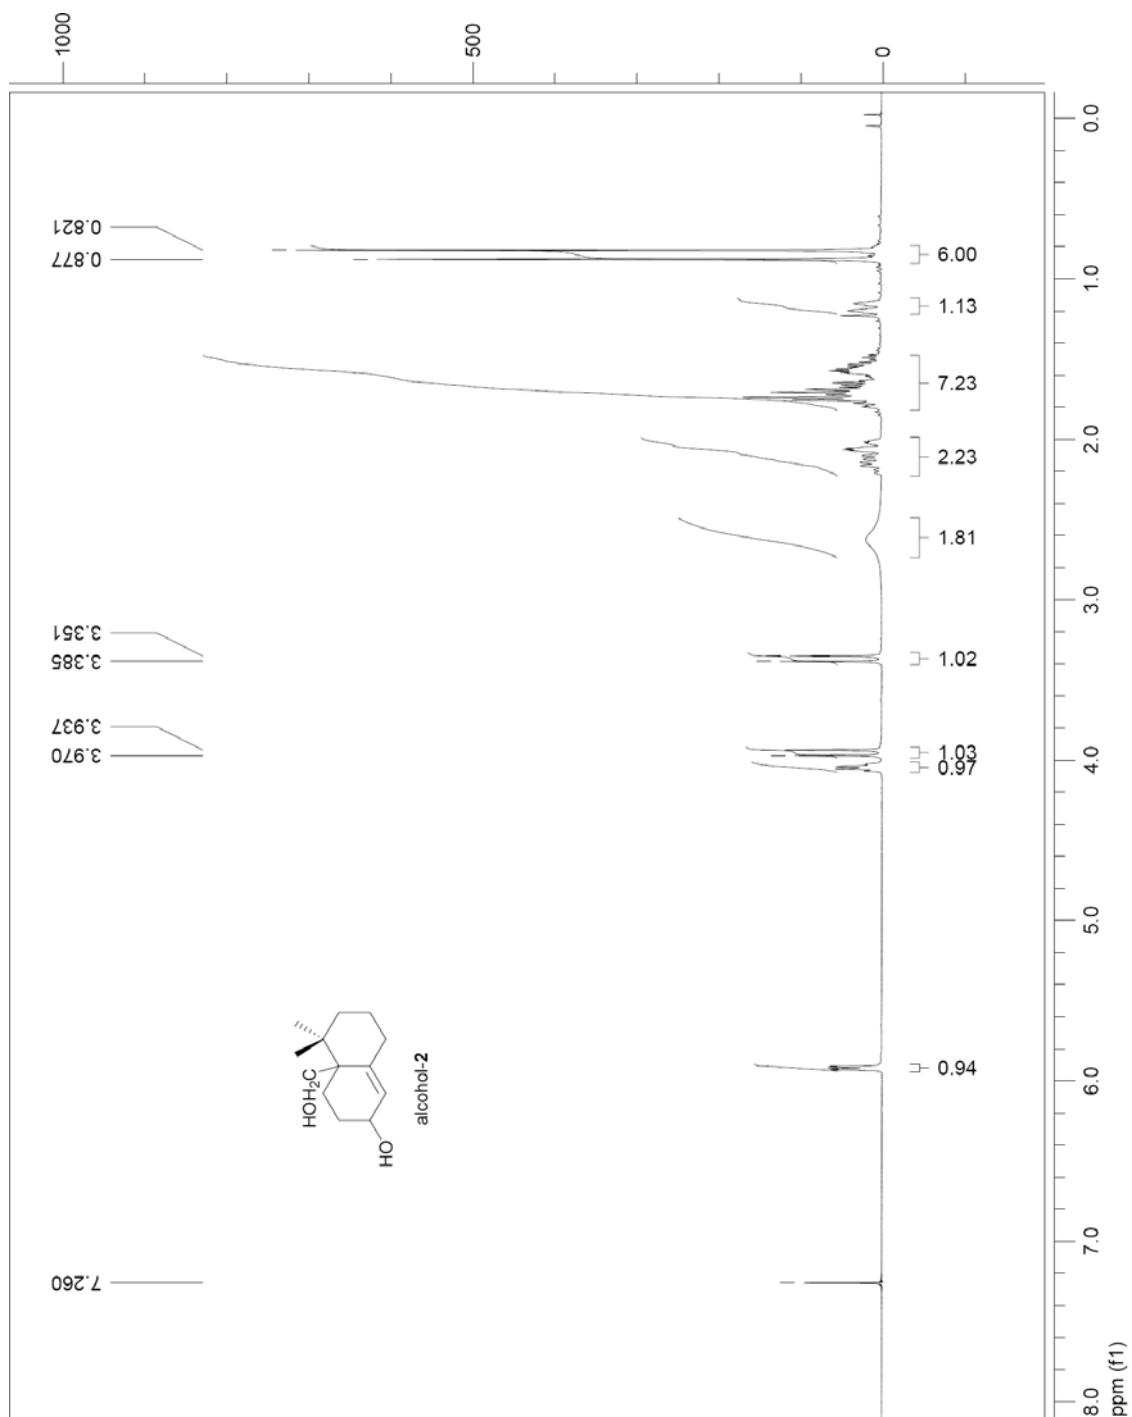

## 2. Aldehyde-2

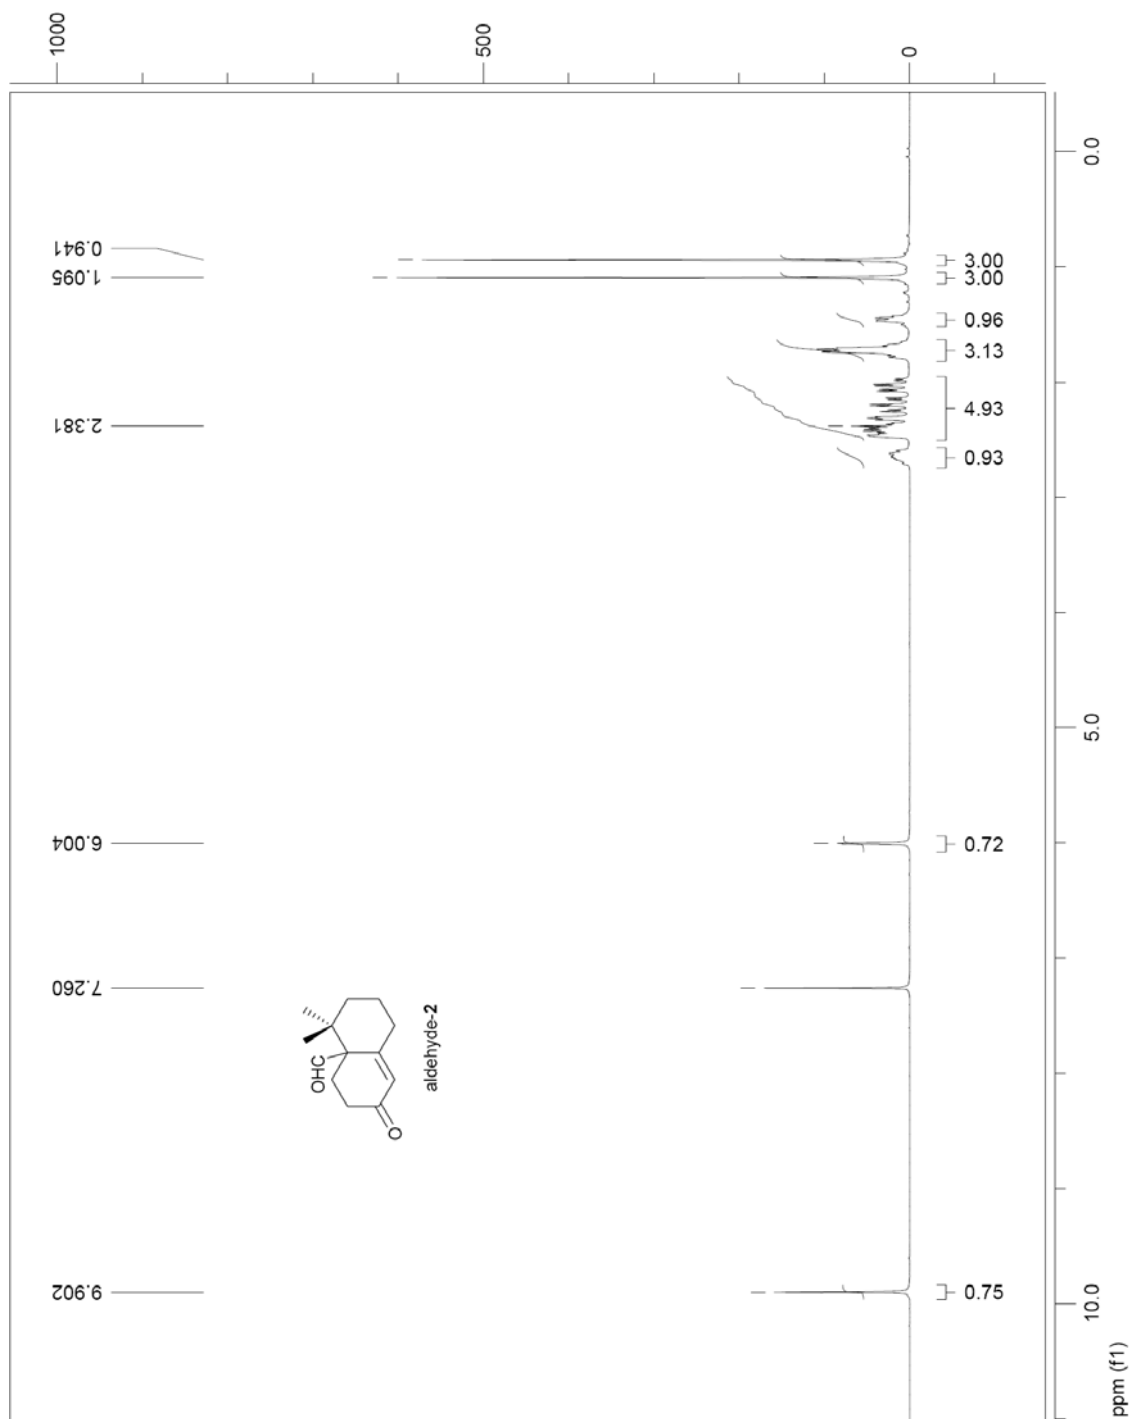



3. Acid-2

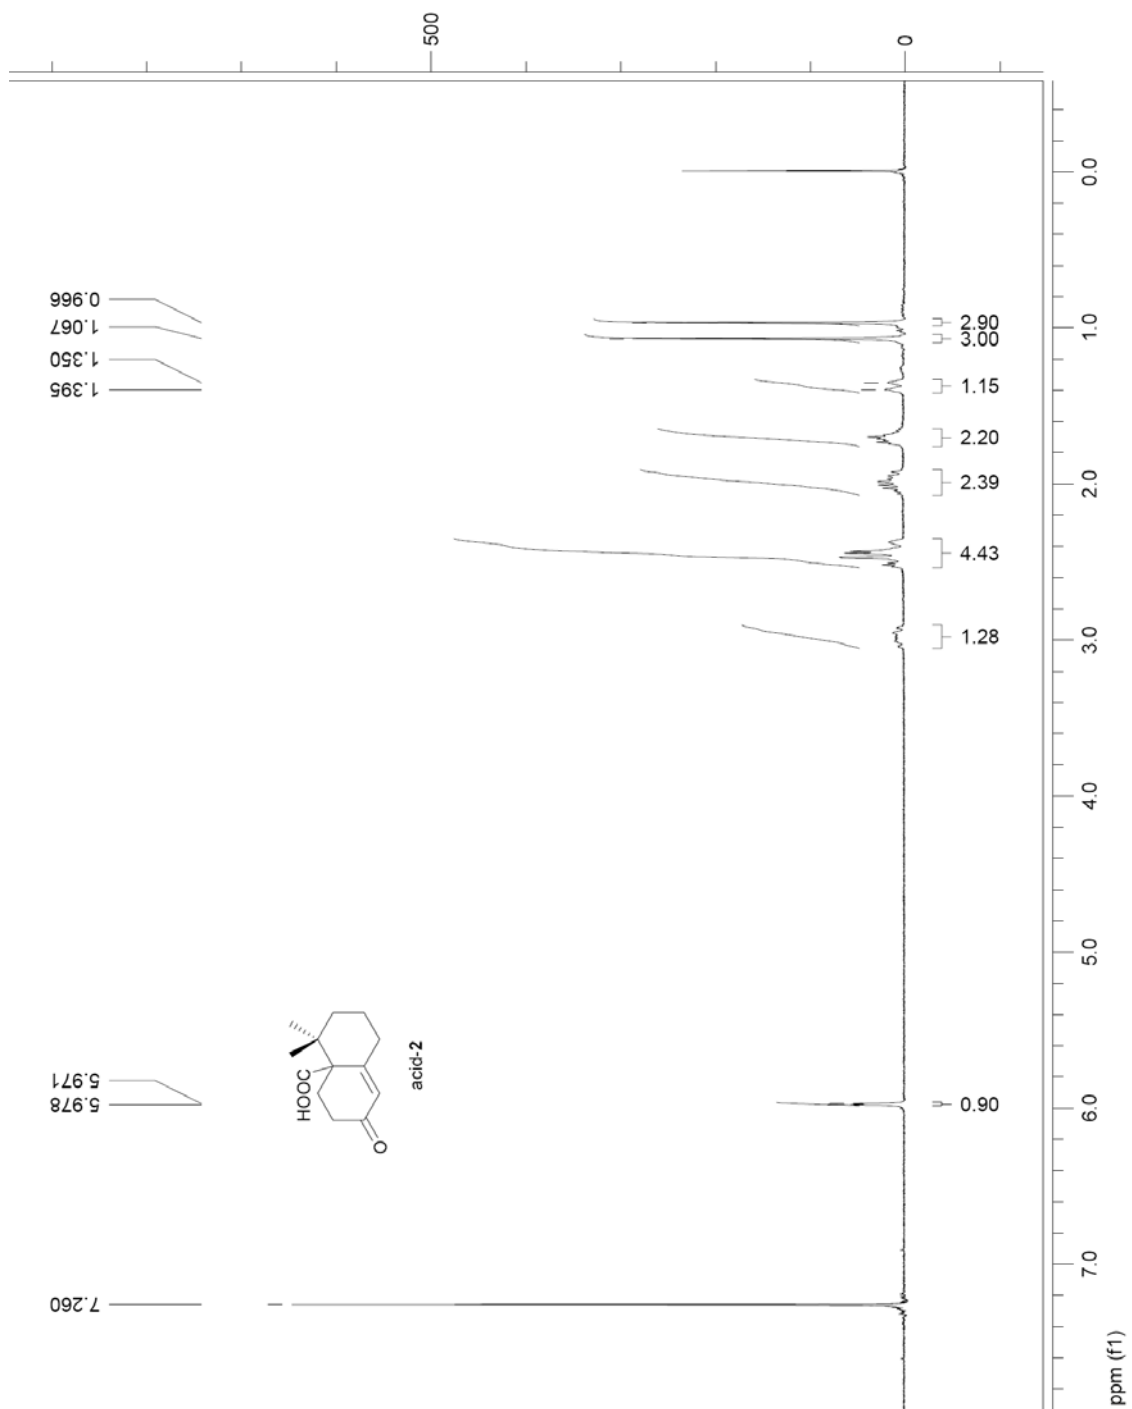

#### 4. Compound 4

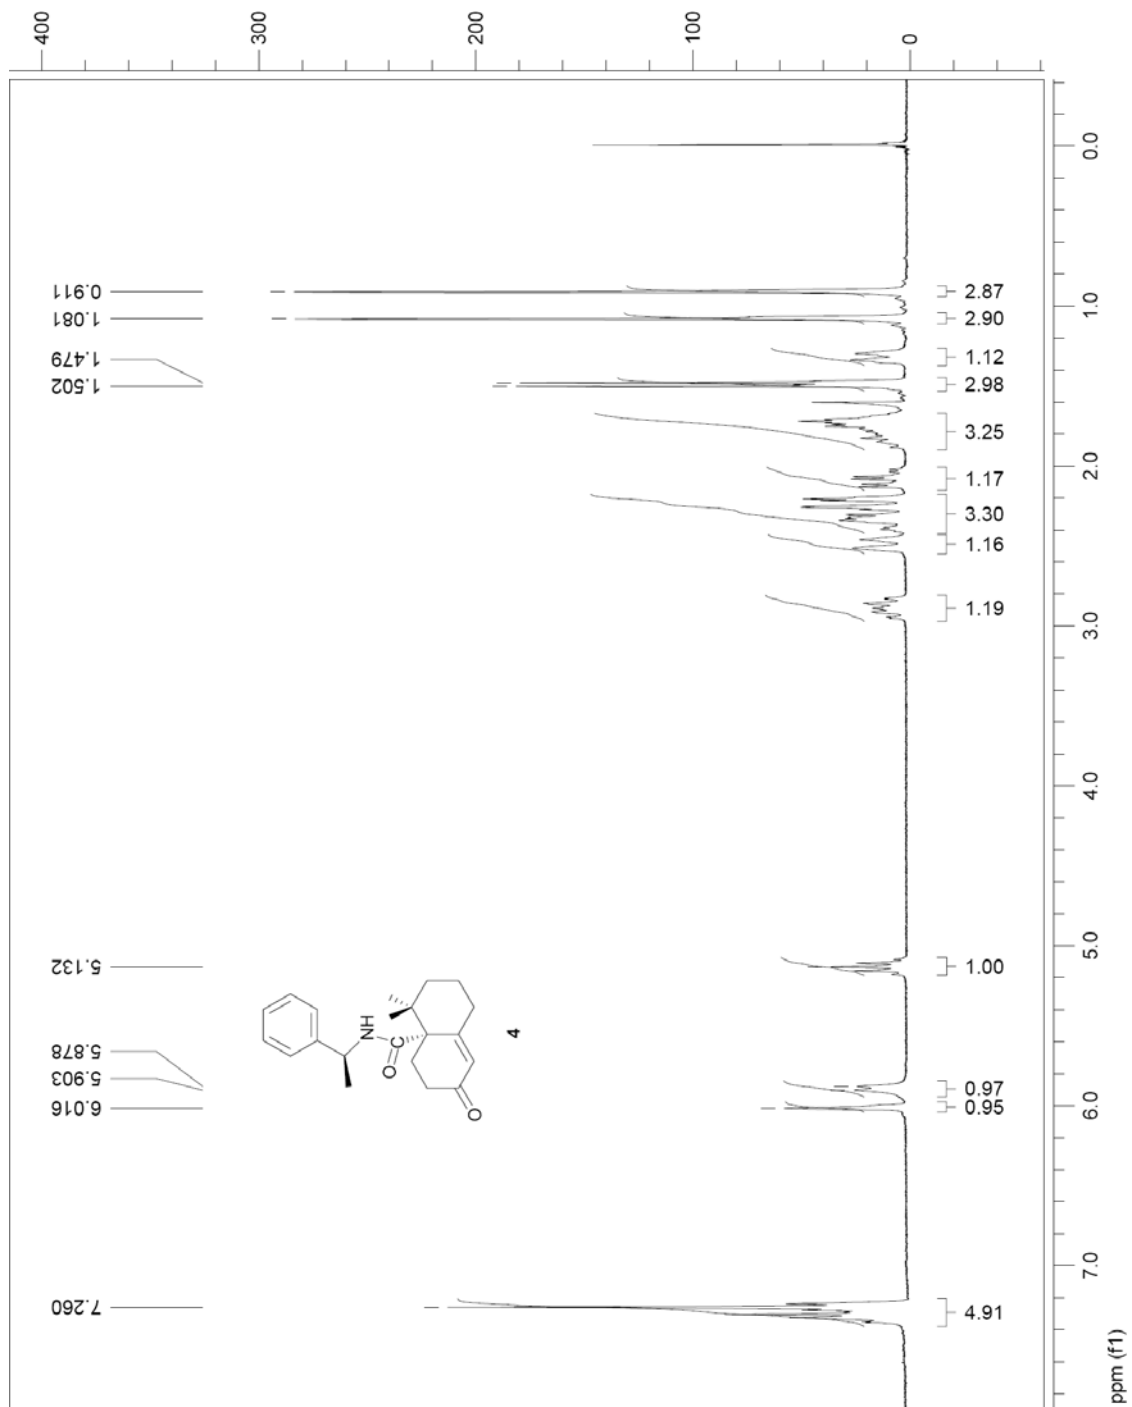

5. Compound 4'

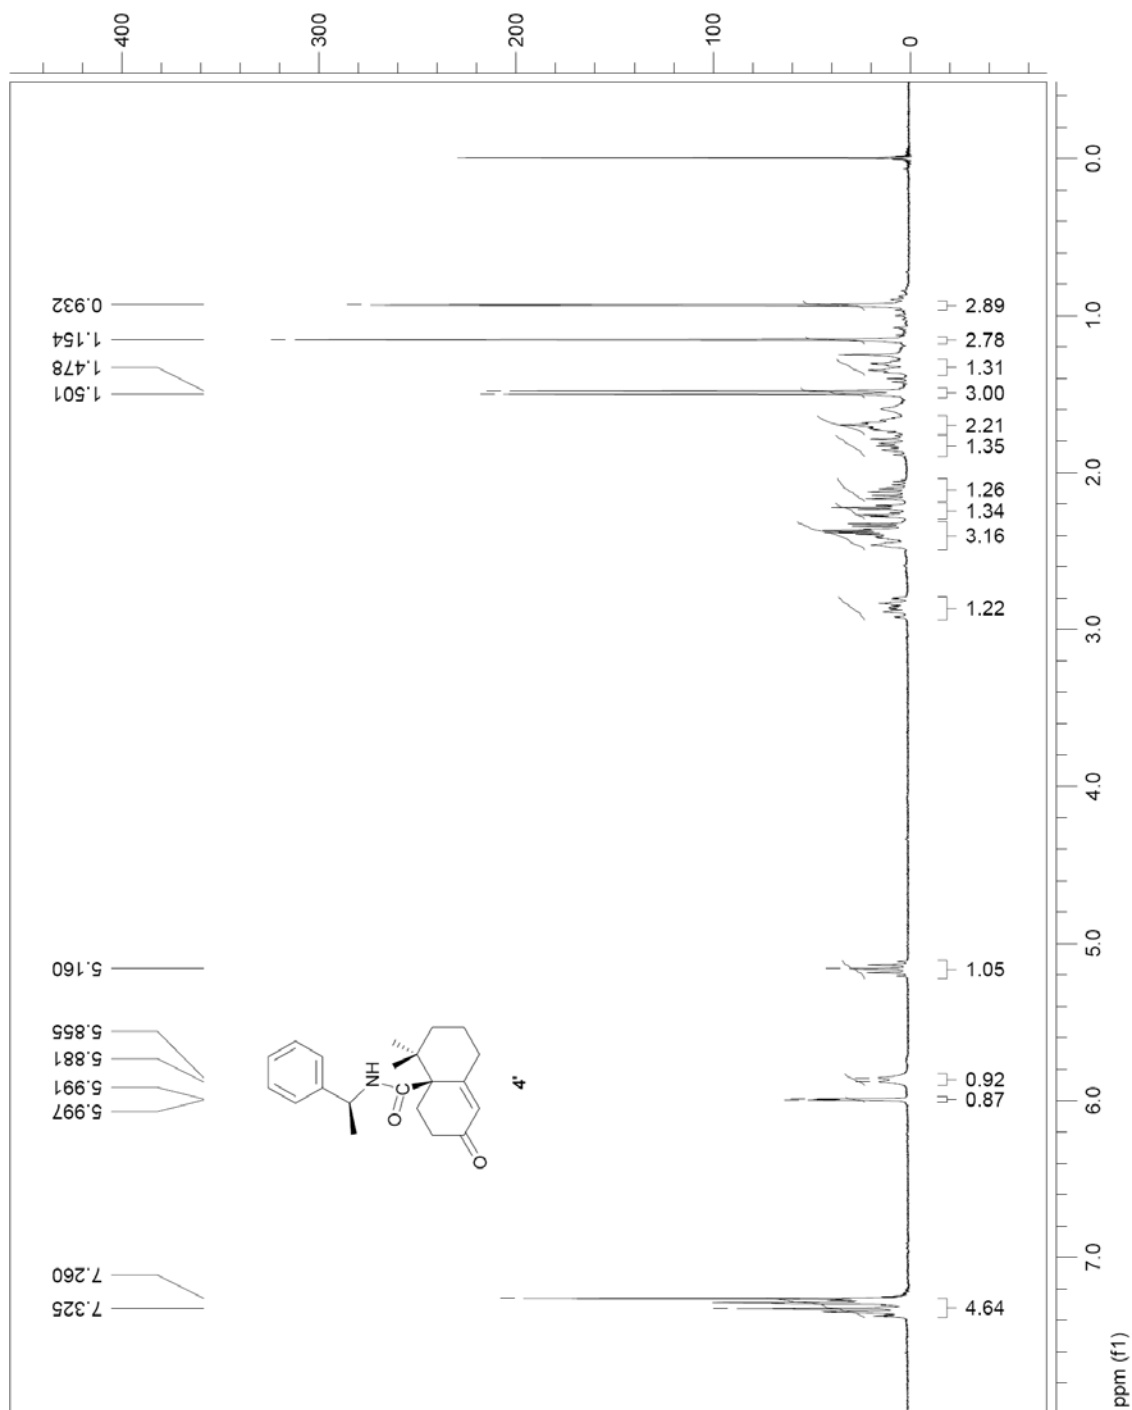

### 6. Compound 5

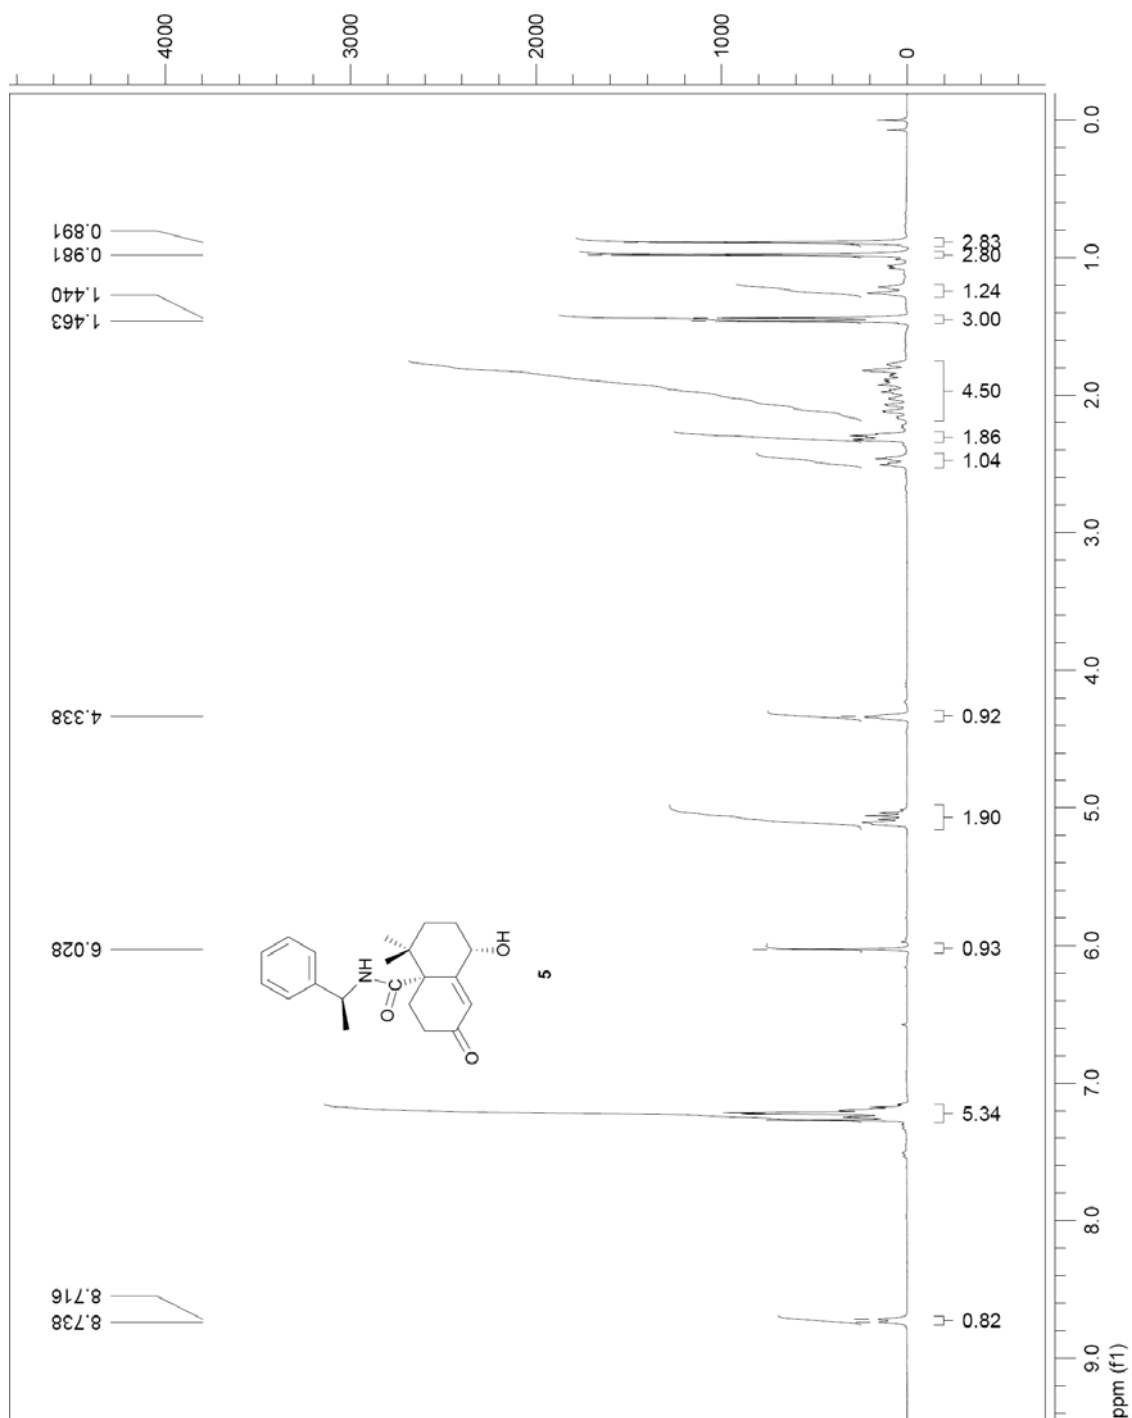

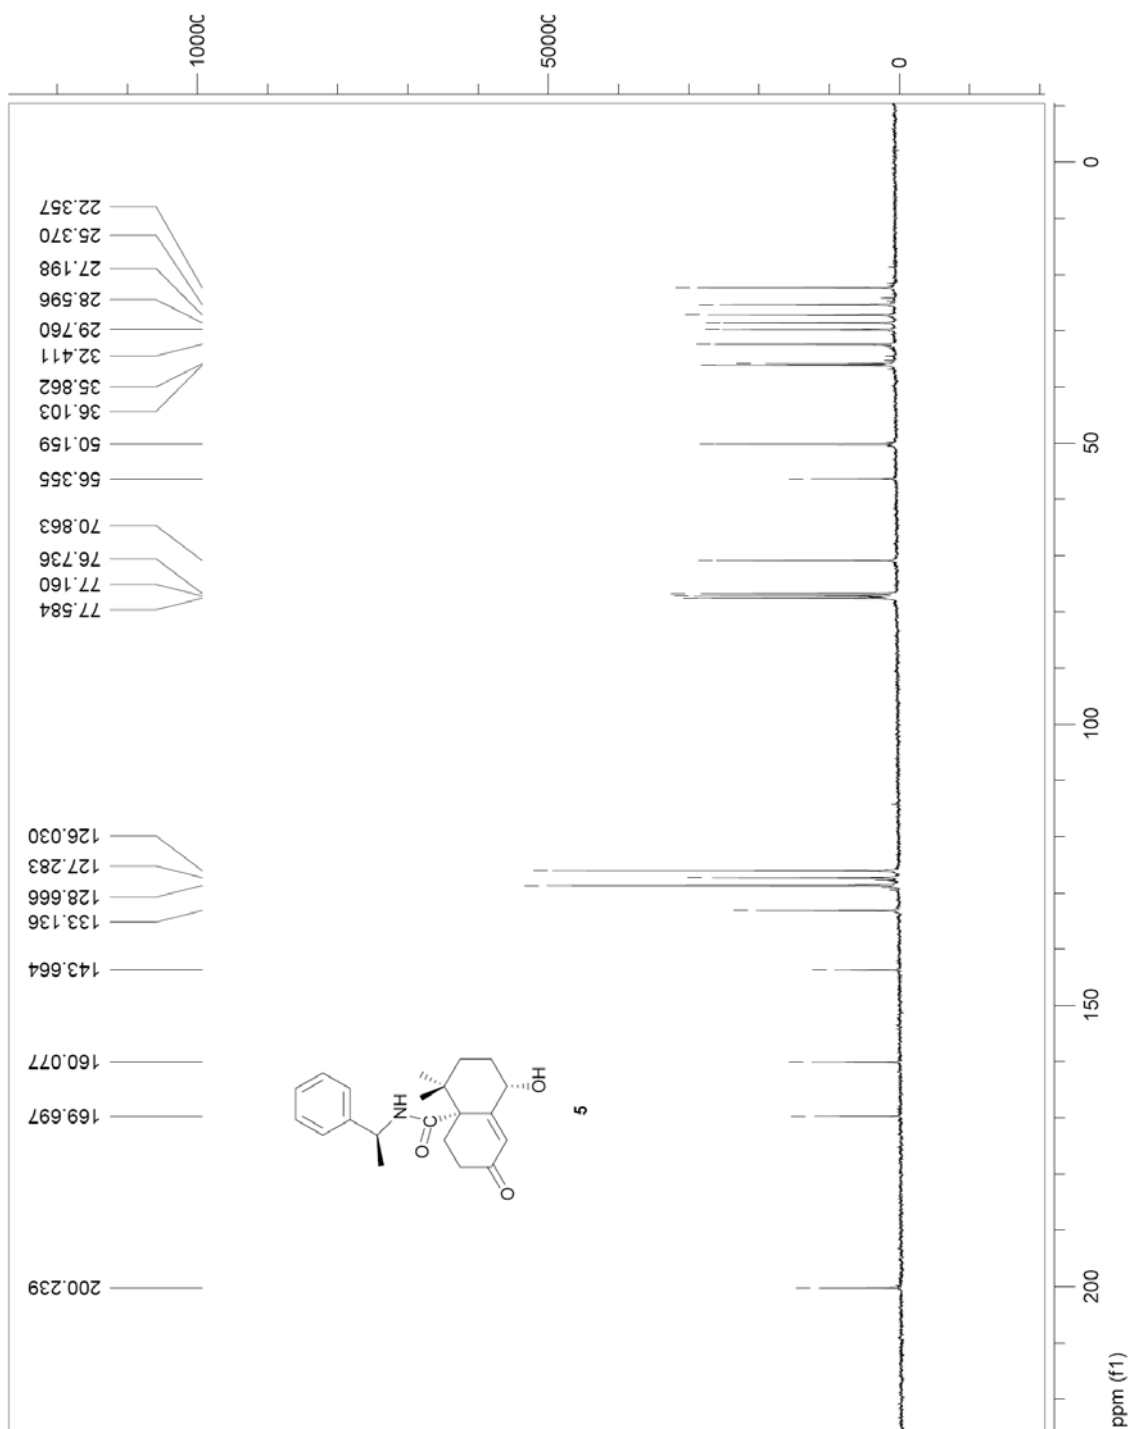

### 7. Compound 8

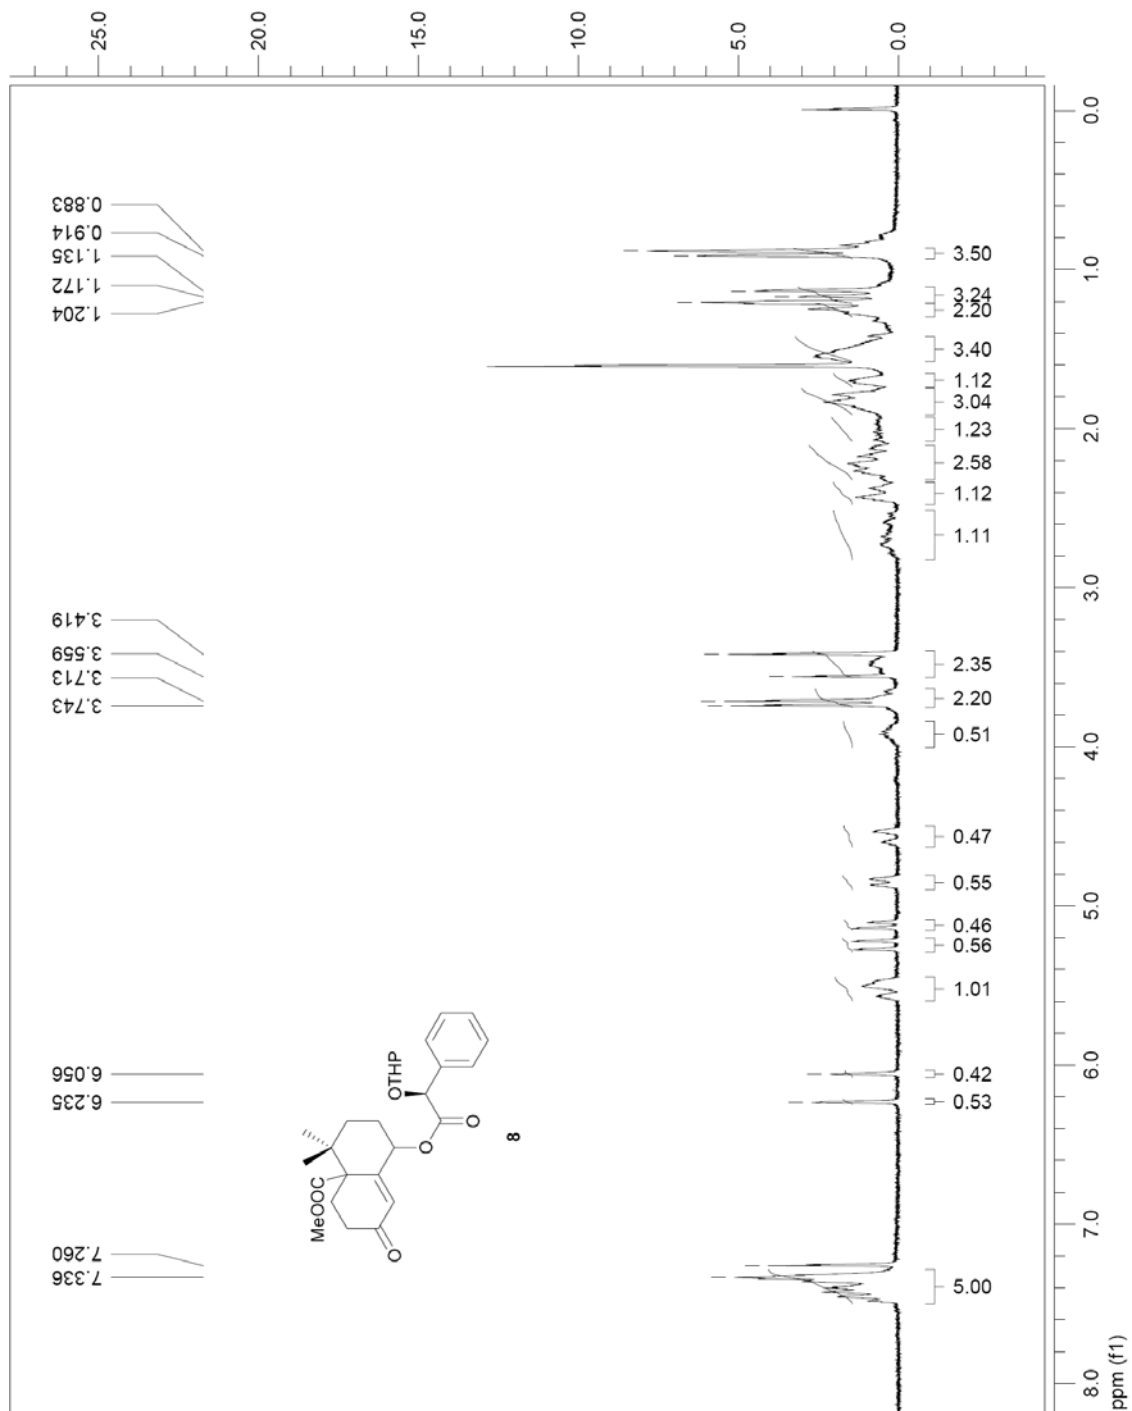

### 8. Compound 9

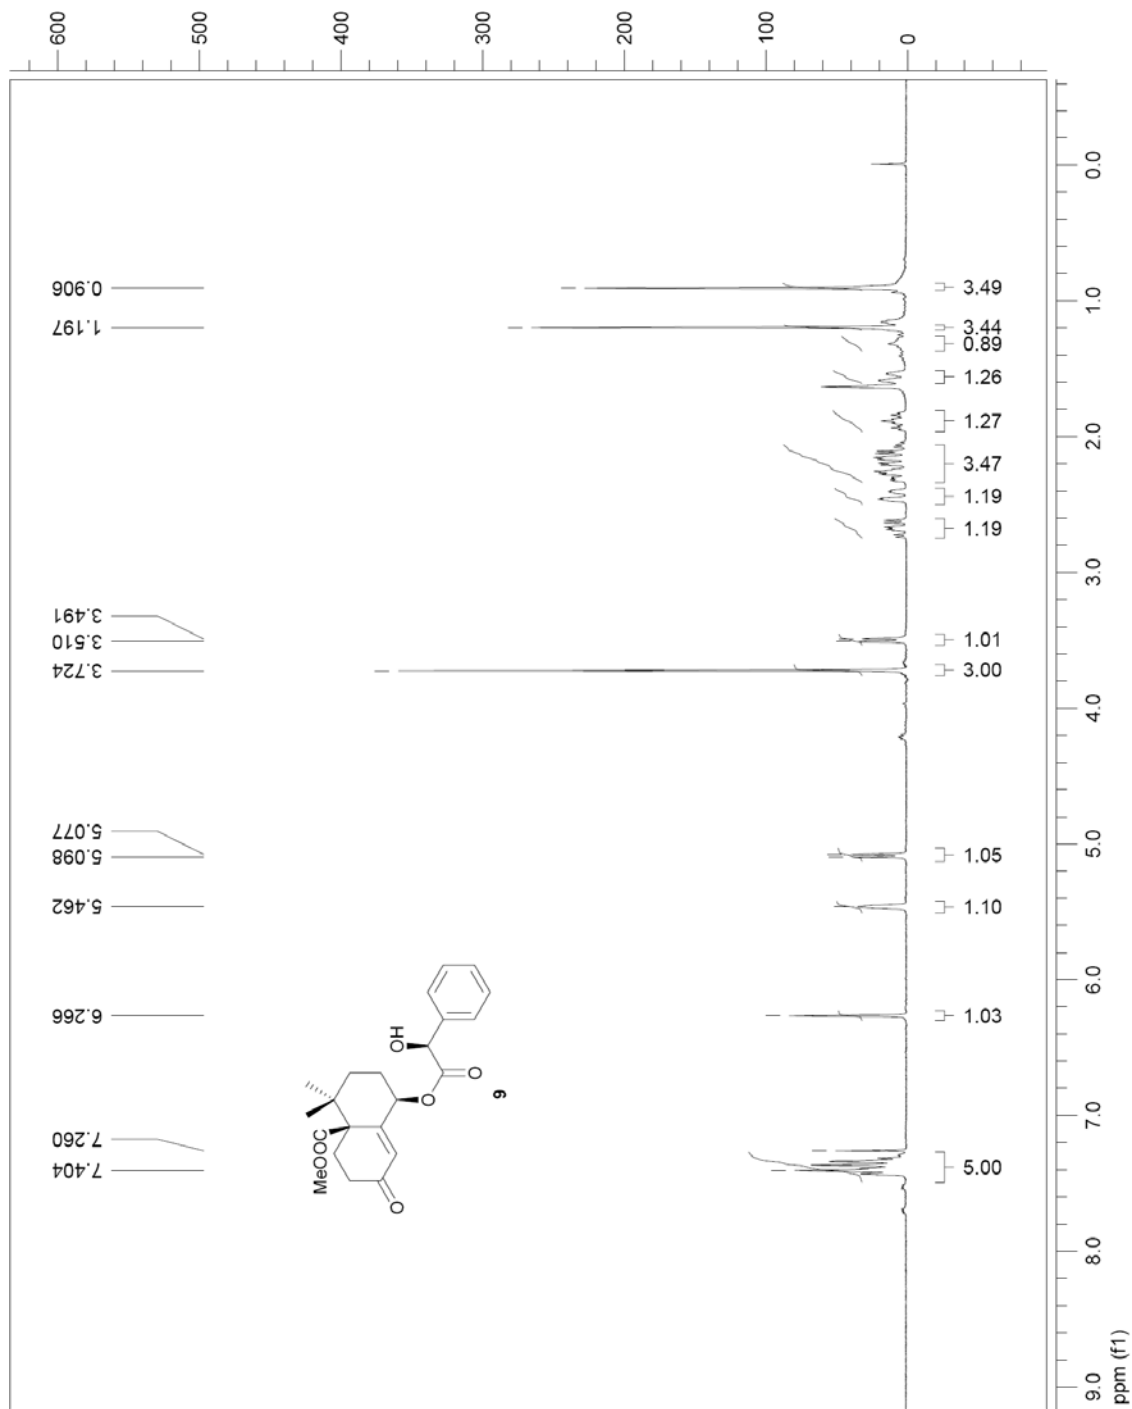

### 9. Compound 9'

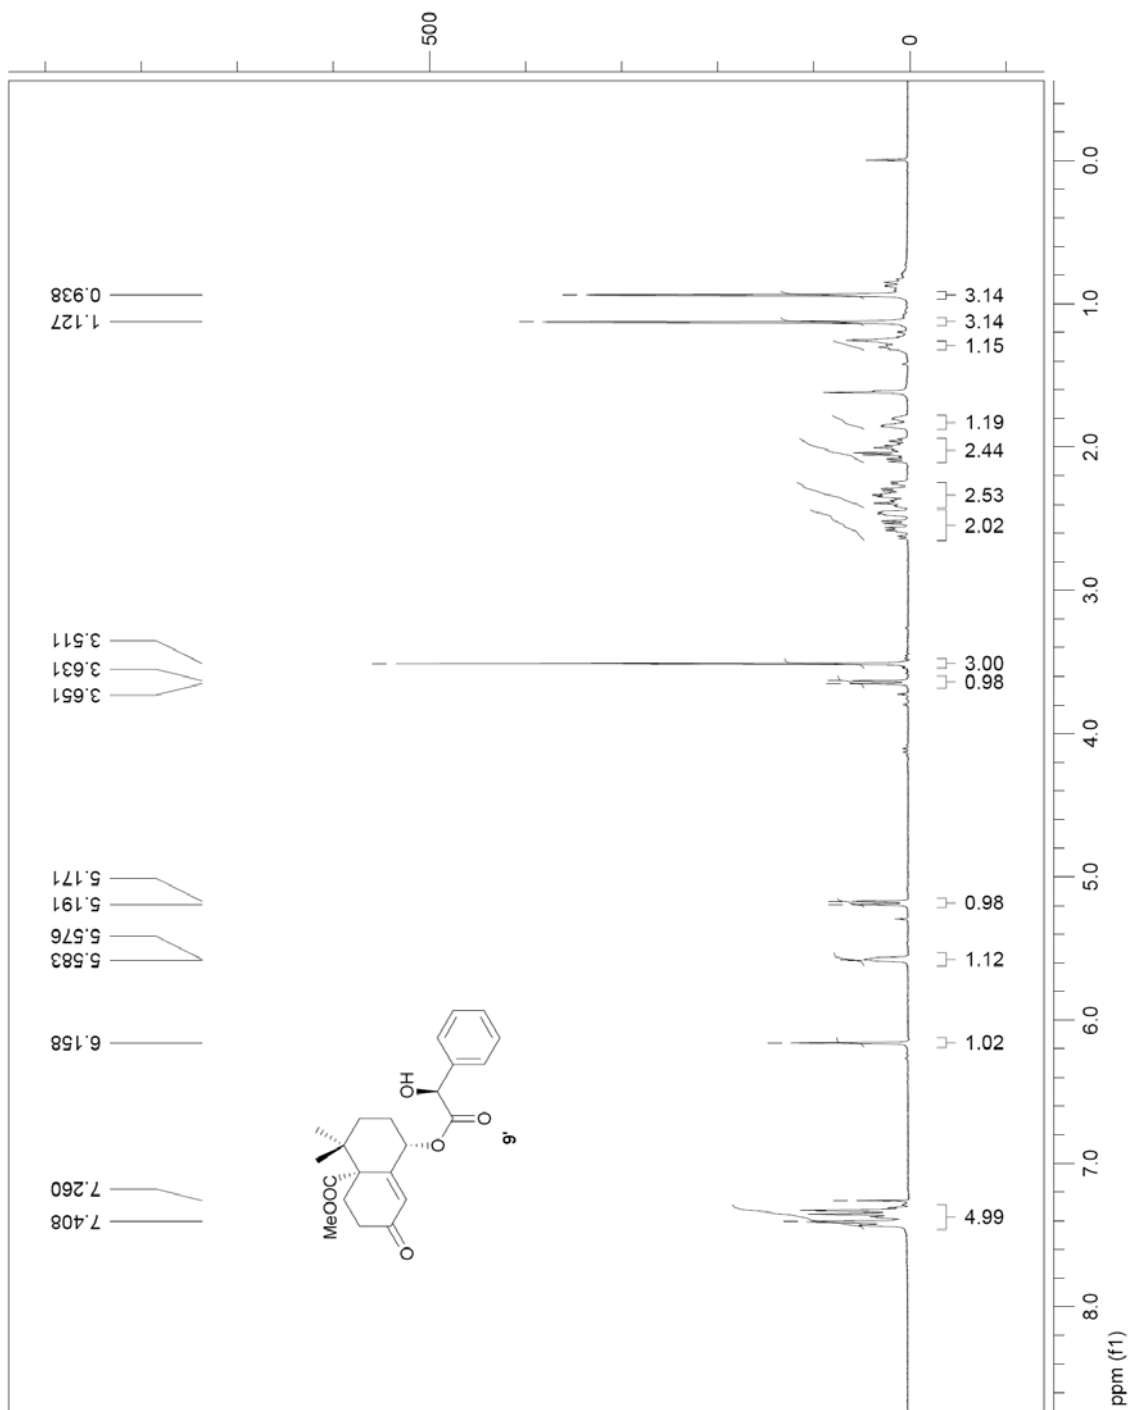



10. Compound (+)-10

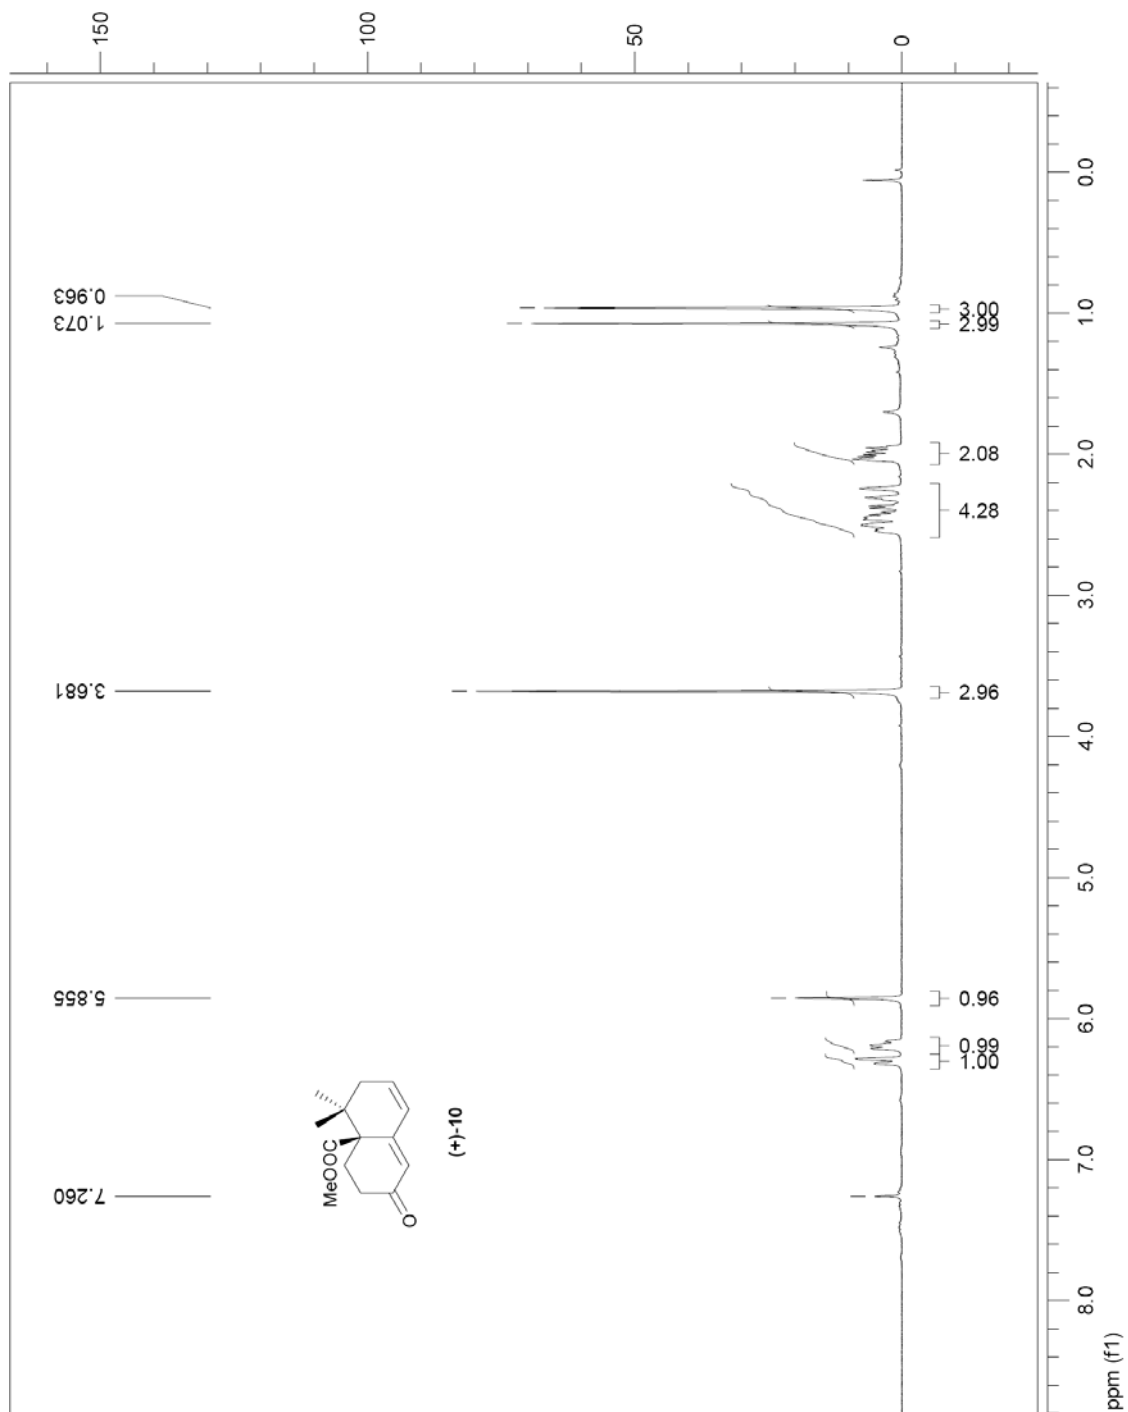

### 11. Compound (-)-10

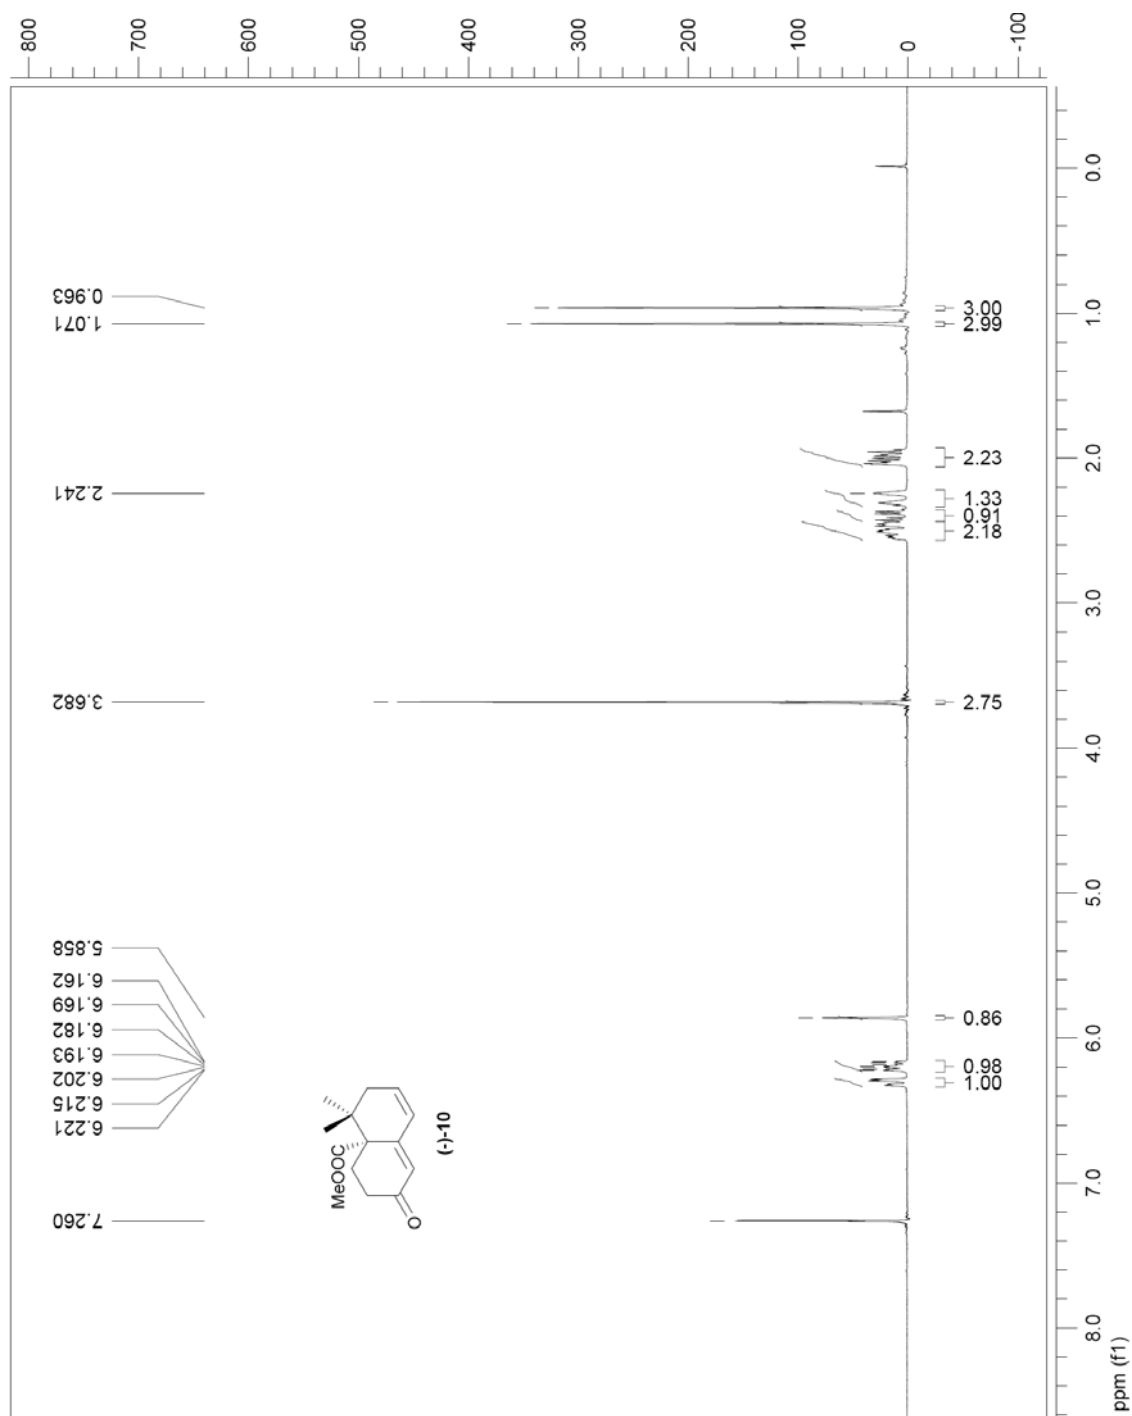

### 12. (+)-Spiniferin-1

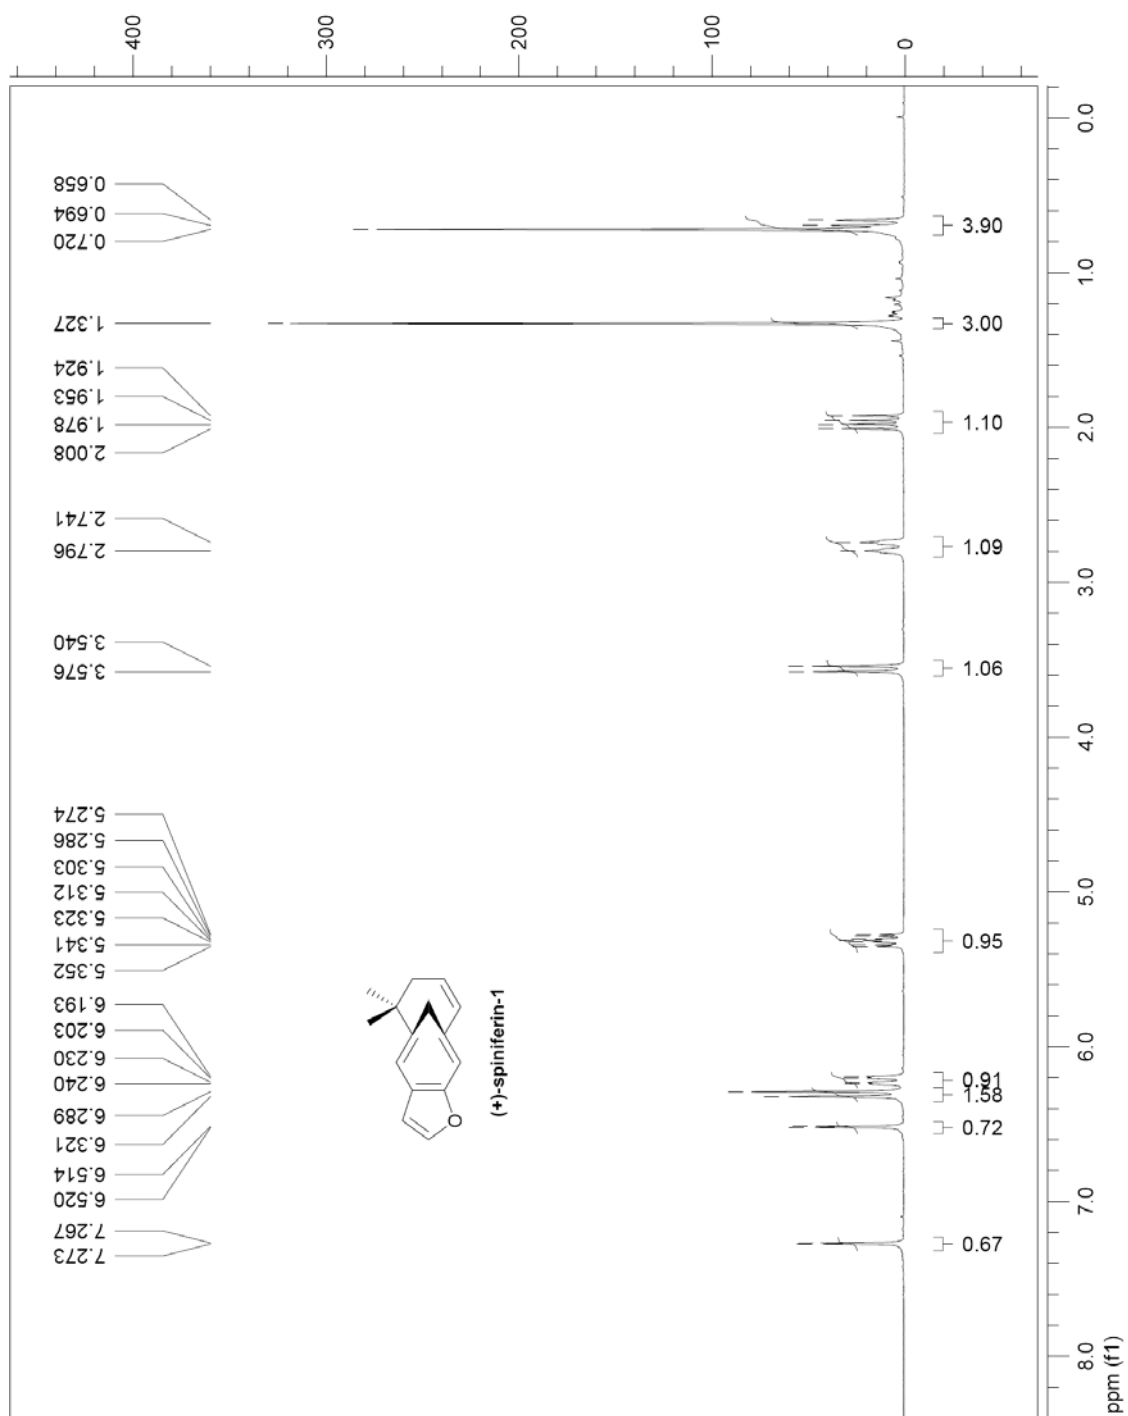

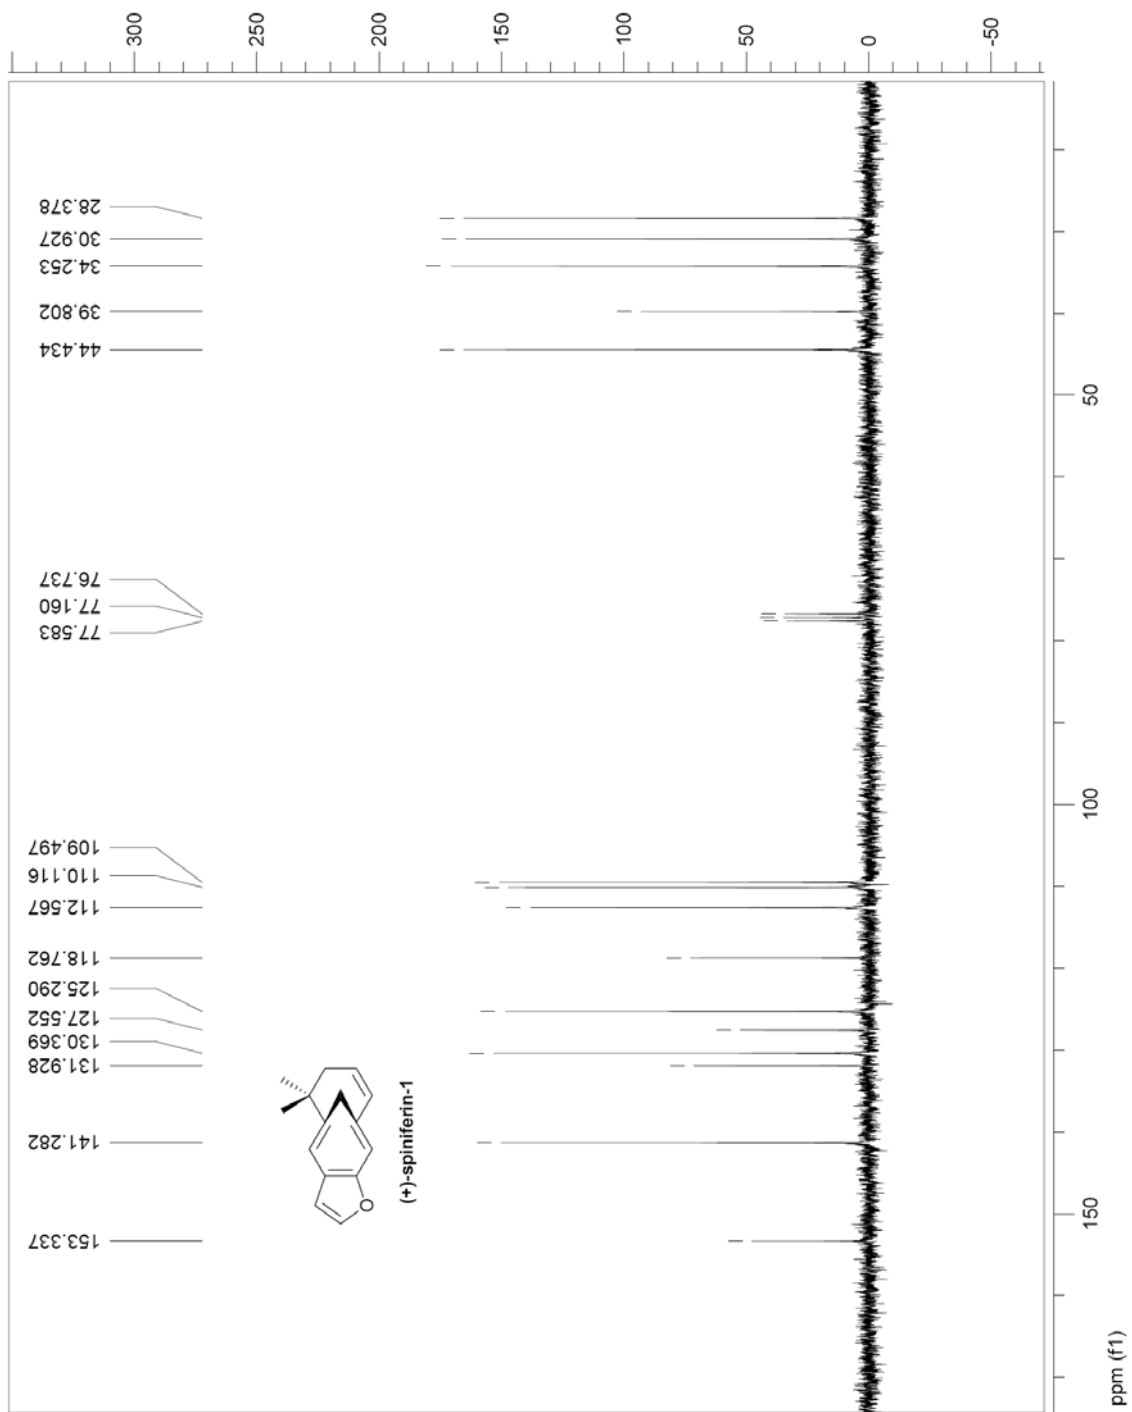

### 13. (-)-Spiniferin-1

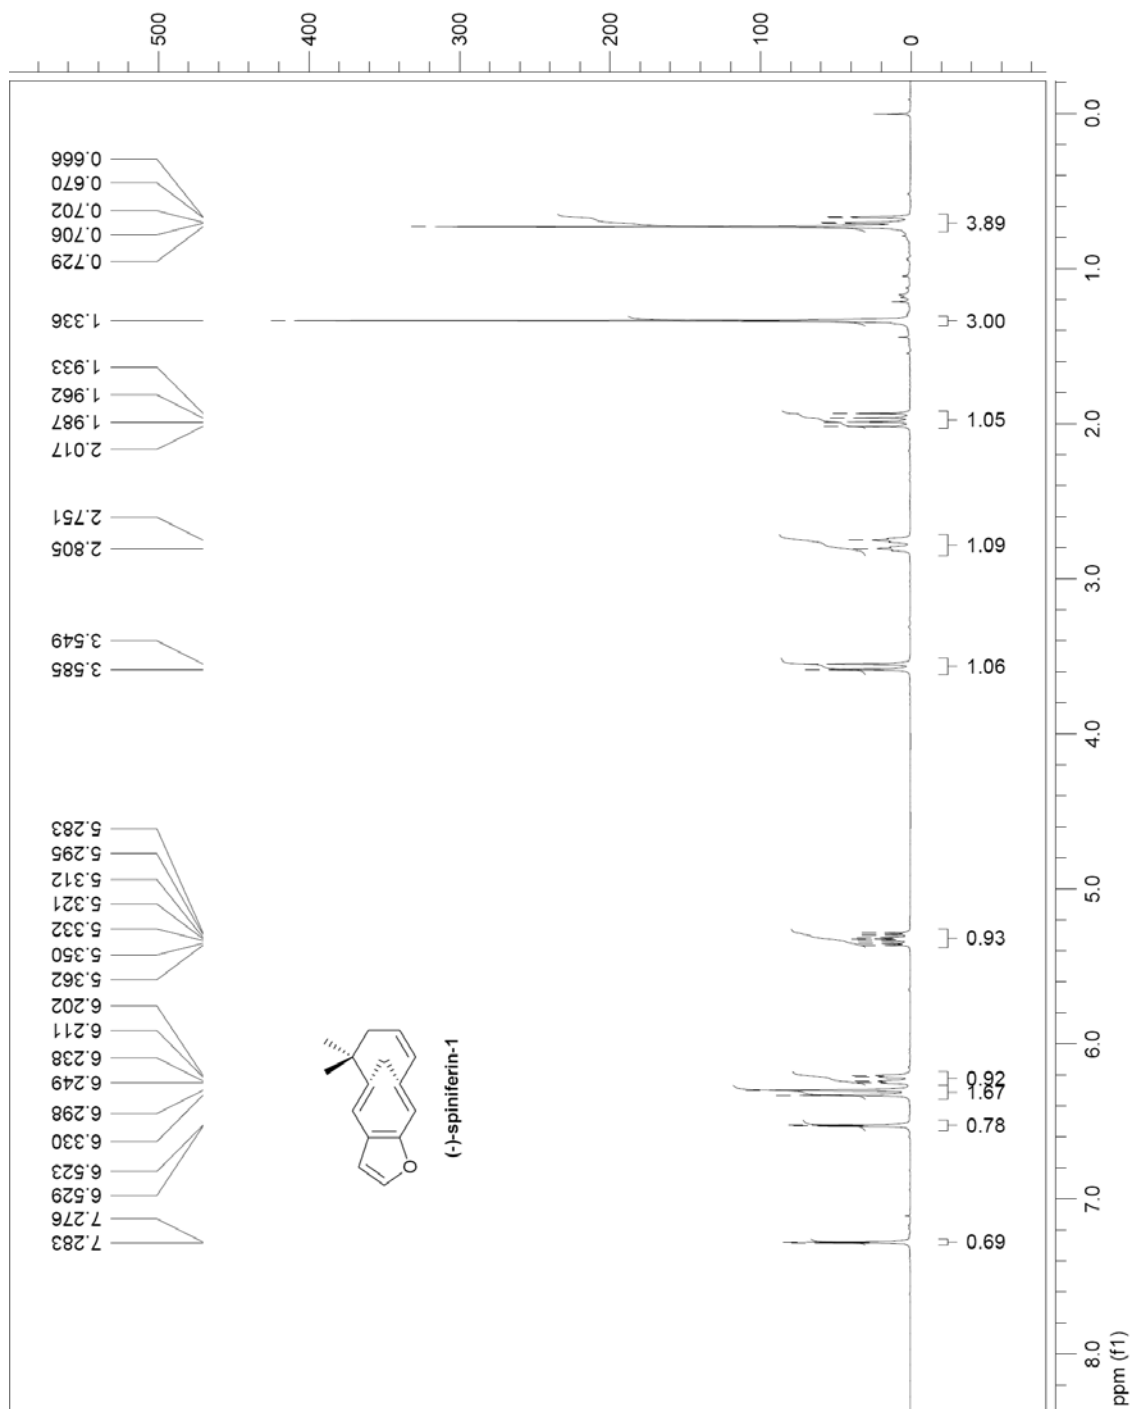

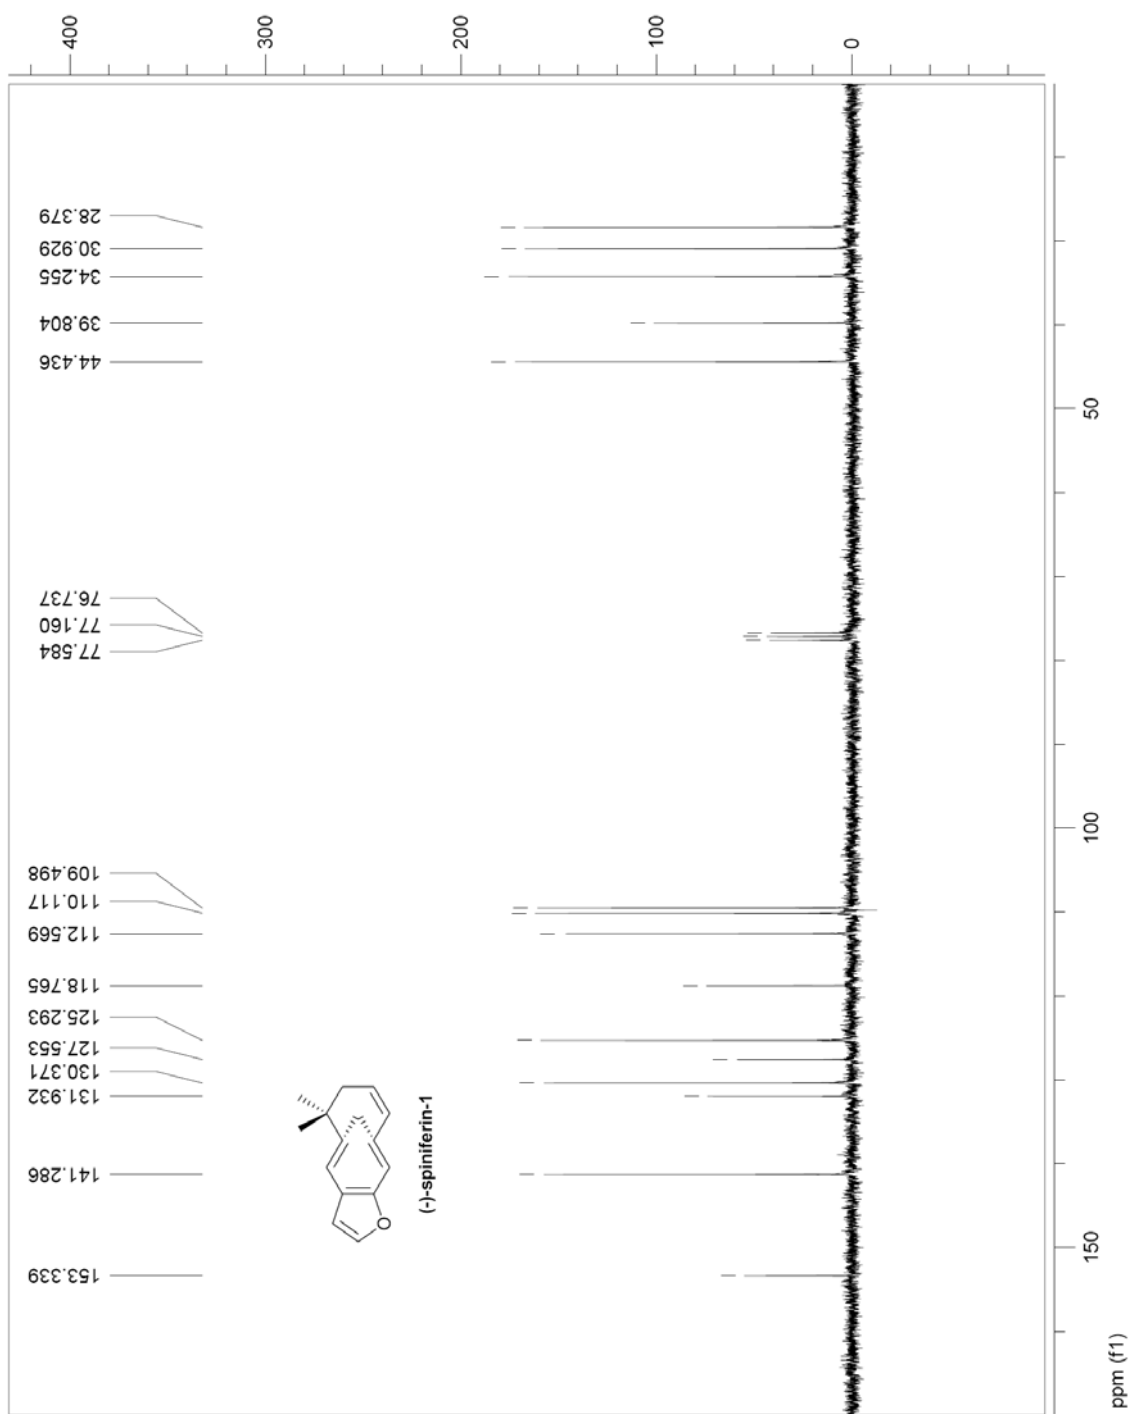

### CD Spectra of (+)-spiniferin-1 and (-)-spiniferin-1 in methanol

\*Spectrometer / Data system JASCO Corp., J-810, Rev. 1.00

Xunits: nanometers; Yunits: CD[mdeg]

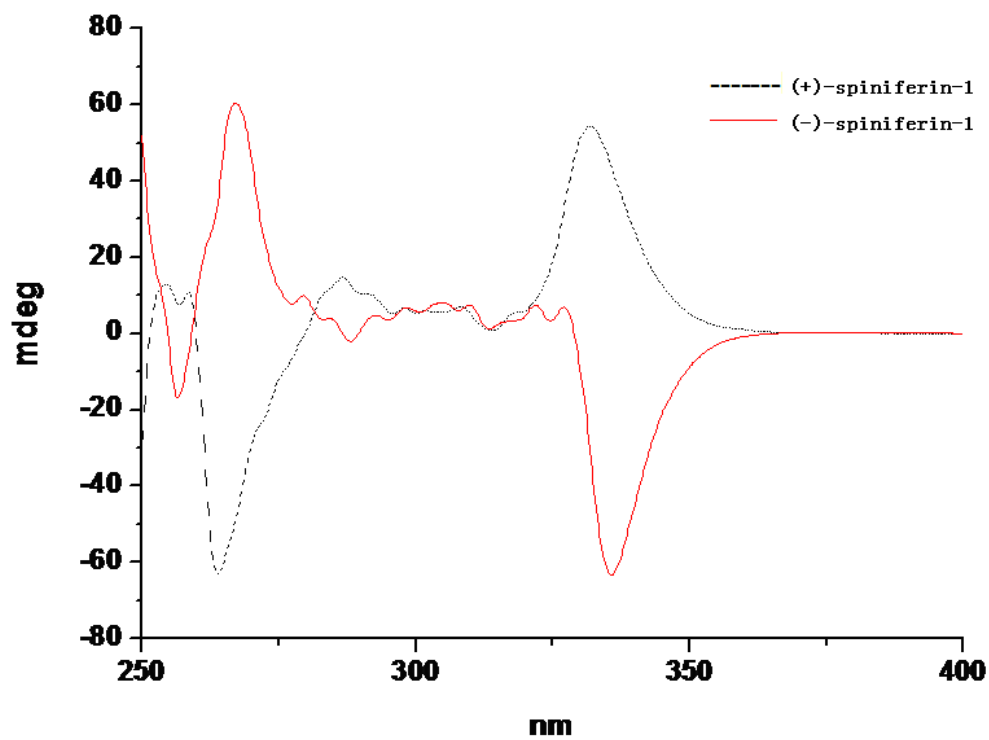

1. W. C. Still, M. Kahn, A. Mitra, *J. Org. Chem.* 1978, **43**, 2923.
2. K. Ding, Y. S. Sun and W. S. Tian, *J. Org. Chem.*, 2011, **76**, 1495.
